# Supplementary material for: Bipolar redox electrolyte-synergistically mediated NiCoMn-811 high-Ni ternary perovskite fluorides for advanced supercapacitors in both alkaline and neutral media
Source: Royal Society of Chemistry journal article supplement (doi:10.1039/d1ta01156a), 2021-01-01
Supplement: d1ta01156a1.pdf [file d1ta01156a1.pdf]

## Electronic Supplementary Information

### **Bipolar redox electrolytes-synergistically mediated NiCoMn-811 high-Ni ternary perovskite fluorides for advanced supercapacitors in both alkaline and neutral media†**

Wei Shi,<sup>1a</sup> Wujiang Yu,<sup>1a</sup> Rui Ding,<sup>\*a</sup> Ziyang Jia,<sup>a</sup> Yi Li,<sup>a</sup> Yuxi Huang,<sup>a</sup> Caini Tan,<sup>a</sup>  
Xiujuan Sun,<sup>a</sup> and Enhui Liu<sup>a</sup>

---

<sup>a</sup> *Key Laboratory of Environmentally Friendly Chemistry and Applications of Ministry of Education, College of Chemistry, Xiangtan University (XTU), Xiangtan, Hunan, 411105, P.R. China. Emails: [drm8122@163.com](mailto:drm8122@163.com) ; [drm8122@xtu.edu.cn](mailto:drm8122@xtu.edu.cn)*

<sup>†</sup> *The authors contribute equally to the work.*

## Table of Contents

**Fig. S1** The crystalline structures of perovskite  $\text{KMF}_3$  and crystalline parameters for  $\text{KNiF}_3$ ,  $\text{KCoF}_3$  and  $\text{KMnF}_3$ .

**Fig. S2** Performance of single electrode: CV plots at  $2\text{-}160\text{ mV s}^{-1}$  of  $1^\#\text{-}9^\#$  samples

**Fig. S3** Performance of single electrode: GCD curves at  $1\text{-}32\text{ A g}^{-1}$  of  $1^\#\text{-}9^\#$  samples

**Fig. S4** SEM (a, b) and TEM (c, d) images of the  $8^\#$  samples

**Fig. S5** TEM-mapping (a-f) images and EDS data (g) of the  $8^\#$  sample.

**Fig. S6** The  $5^{\text{th}}$  /  $12^{\text{th}}$  segments of CV tests at  $30\text{ mV s}^{-1}$  for *ex situ* XPS tests (a) and XPS survey scans in pristine, fully charged and discharged states (after the  $5^{\text{th}}$  /  $12^{\text{th}}$  segments of CV tests at  $30\text{ mV s}^{-1}$ ) of the  $8^\#$  electrode.

**Fig. S7** Performance of AC single electrode: CV plots at  $10\text{-}80\text{ mV s}^{-1}$  (inset of  $\lg v\text{-}\lg i$ ) (a) and GCD curves at  $1\text{-}32\text{ A g}^{-1}$  of AC electrode.

**Fig. S8** CV plots at  $2\text{-}160\text{ mV s}^{-1}$  of the  $8^\#$  electrode in  $3\text{ M KOH}+0.5\text{ M LiOH}$  (A) electrolytes with different concentrations of  $[\text{Fe}(\text{CN})_6]^{3-}$  additive (the inset of **Fig.S8c** shows the plots of  $\lg v\text{-}\lg i$  in A electrolytes and  $10\text{ mM }[\text{Fe}(\text{CN})_6]^{3-}$  additive).

**Fig. S9** GCD curves at  $1\text{-}64\text{ A g}^{-1}$  of the  $8^\#$  electrode in  $3\text{ M KOH}+0.5\text{ M LiOH}$  (A) electrolytes with different concentrations of  $[\text{Fe}(\text{CN})_6]^{3-}$  additives.

**Fig. S10** Pseudocapacitive/diffusion contribution ratio (a) and the area for pseudocapacitive part in the CV plots at  $2\text{-}20\text{ mV s}^{-1}$  (b-e) of the  $8^\#$  electrode in  $3\text{ M KOH}+0.5\text{ M LiOH}$  (A) electrolytes with  $10\text{ mM }[\text{Fe}(\text{CN})_6]^{3-}$  additives.

**Fig. S11** CV plots at  $10\text{-}160\text{ mV s}^{-1}$  of the AC electrode in  $3\text{ M KOH}+0.5\text{ M LiOH}$  (A) electrolytes with different concentrations of  $[\text{Cu}(\text{NH}_3)_4]^{2+}$  additive (the inset of Fig.S10c shows the plots of  $\lg v\text{-}\lg i$  in A+ $10\text{ mM }[\text{Cu}(\text{NH}_3)_4]^{2+}$ ).

**Fig. S12** GCD curves at  $1\text{-}64\text{ A g}^{-1}$  of the AC electrode in  $3\text{ M KOH}+0.5\text{ M LiOH}$  (A) with different concentrations of  $[\text{Cu}(\text{NH}_3)_4]^{2+}$  additives.

**Fig. S13** The area for pseudocapacitive part in the CV plots (a-e) and pseudocapacitive/diffusion contribution ratio (f) at  $10\text{-}160\text{ mV s}^{-1}$  of the AC electrode in  $3\text{ M KOH}+0.5\text{ M LiOH}$  (A) electrolytes with  $10\text{ mM }[\text{Cu}(\text{NH}_3)_4]^{2+}$  additives.

**Fig. S14** GCD curves at  $1\text{ A g}^{-1}$  of AC electrode in  $3\text{ M KNO}_3$  (C) with  $10\text{ mM}$

$[\text{Cu}(\text{NH}_3)_4]^{2+}$  additive.

**Fig. S15** The CV plots at 2-160  $\text{mV s}^{-1}$  (Inset shows the plots of  $\lg v - \lg i$ ) (a) and GCD curves at 1-32  $\text{A g}^{-1}$  (b) of the 8<sup>#</sup> electrode in 3 M  $\text{KNO}_3$  (C)+10 mM  $\text{K}_3[\text{Fe}(\text{CN})_6]$ ; the CV plots at 10-160  $\text{mV s}^{-1}$  (Inset shows the plots of  $\lg v - \lg i$ ) (c) and GCD curves at 1-64  $\text{A g}^{-1}$  (d) of AC electrode in 3 M  $\text{KCl}$  (B)+10 mM  $[\text{Cu}(\text{NH}_3)_4]^{2+}$ .

**Fig. S16** Pseudocapacitive/diffusion contribution ratio (a) and the CV area for pseudocapacitive part in the CV plots at 2-20  $\text{mV s}^{-1}$  of the 8<sup>#</sup> electrode in 3 M  $\text{KNO}_3$  (C) electrolytes with 10 mM  $[\text{Fe}(\text{CN})_6]^{3-}$  additives.

**Fig. S17** The CV area for pseudocapacitive part in the CV plots (a-e) and pseudocapacitive/diffusion contribution ratio (f) at 10-160  $\text{mV s}^{-1}$  of the AC electrode in 3 M  $\text{KCl}$  (B) electrolytes with 10 mM  $[\text{Cu}(\text{NH}_3)_4]^{2+}$  additives.

**Fig. S18** The detail drawing for H-type SC structure

**Fig. S19** The CV window (a, d, g), CV plots of 10-160  $\text{mV s}^{-1}$  (b, e, h) and GCD curves at 1-32  $\text{A g}^{-1}$  (c, f, i) of I, II and III H-type capacitors

I : AC ( A+10 mM  $[\text{Cu}(\text{NH}_3)_4]^{2+}$ ) // 811-8<sup>#</sup> ( A+10 mM  $[\text{Fe}(\text{CN})_6]^{3-}$ )

II : AC ( A+10 mM  $[\text{Cu}(\text{NH}_3)_4]^{2+}$ ) // 811-8<sup>#</sup> ( A+20 mM  $[\text{Fe}(\text{CN})_6]^{3-}$ )

III: AC ( B+10 mM  $[\text{Cu}(\text{NH}_3)_4]^{2+}$ ) // 811-8<sup>#</sup> ( A+10 mM  $[\text{Fe}(\text{CN})_6]^{3-}$ )

**Fig. S20** The CV window (a, d, g), CV plots of 10-160  $\text{mV s}^{-1}$  (b, e, h) and GCD curves at 1-32  $\text{A g}^{-1}$  (c, f, i) of IV, V and VI H-type capacitors

IV: AC ( A+10 mM  $[\text{Cu}(\text{NH}_3)_4]^{2+}$ ) // 811-8<sup>#</sup> ( C+10 mM  $[\text{Fe}(\text{CN})_6]^{3-}$ )

V : AC ( B+10 mM  $[\text{Cu}(\text{NH}_3)_4]^{2+}$ ) // 811-8<sup>#</sup> ( C+10 mM  $[\text{Fe}(\text{CN})_6]^{3-}$ )

VI: AC (A) // 811-8<sup>#</sup> (A)

**Fig. S21** The CV window (a, d), CV plots of 10-160  $\text{mV s}^{-1}$  (b, e) and GCD curves at 1-32  $\text{A g}^{-1}$  (c, f) of I H-type capacitor with high and low temperatures.

**Fig. S22** The CV window (a, d, g, j, m), CV plots of 10-160  $\text{mV s}^{-1}$  (b, e, h, k, n) and GCD curves at 1-32  $\text{A g}^{-1}$  (c, f, i, l, o) of VII-XI H-type capacitors under high temperature.

VII: AC ( A+10 mM  $[\text{Cu}(\text{NH}_3)_4]^{2+}$ ) // 811-8<sup>#</sup> ( A+10 mM  $[\text{Fe}(\text{CN})_6]^{3-}$ +0.5%  $\text{Na}_2\text{MoO}_4$ )

VIII: AC ( A+10 mM  $[\text{Cu}(\text{NH}_3)_4]^{2+}$ ) // 811-8<sup>#</sup> ( A+10 mM  $[\text{Fe}(\text{CN})_6]^{3-}$ +1.0%  $\text{Na}_2\text{MoO}_4$ )

IX: AC ( A+10 mM  $[\text{Cu}(\text{NH}_3)_4]^{2+}$ ) // 811-8<sup>#</sup> ( A+10 mM  $[\text{Fe}(\text{CN})_6]^{3-}$ +1.5%  $\text{Na}_2\text{MoO}_4$ )

X: AC ( A+10 mM  $[\text{Cu}(\text{NH}_3)_4]^{2+}$ ) // 811-8<sup>#</sup> ( A'+10 mM  $[\text{Fe}(\text{CN})_6]^{3-}$ +1.0%  $\text{Na}_2\text{MoO}_4$ )  
XI: AC ( A+10 mM  $[\text{Cu}(\text{NH}_3)_4]^{2+}$ ) // 811-8<sup>#</sup> ( A''+10 mM  $[\text{Fe}(\text{CN})_6]^{3-}$ +1.0%  $\text{Na}_2\text{MoO}_4$ ).

**Fig. S23** The EDS data of the 8<sup>#</sup> cathode in the VIII H-type capacitor [AC ( A+10 mM  $[\text{Cu}(\text{NH}_3)_4]^{2+}$ ) // 811-8<sup>#</sup> ( A+10 mM  $[\text{Fe}(\text{CN})_6]^{3-}$ +1.0%  $\text{Na}_2\text{MoO}_4$ )] after the cycling tests under high temperature.

**Table S1** The orthogonal analysis of KNCMF-811(1<sup>#</sup>-9<sup>#</sup>) electrodes in A electrolytes

**Table S2** Specific capacity (C g<sup>-1</sup>) and cycling retention (%) of the KNCMF-811 (1<sup>#</sup>-9<sup>#</sup>) and AC electrodes in A electrolytes.

**Table S3.** EIS fitting parameters of the 8<sup>#</sup> electrode before and after cycling test in A electrolytes.

**Table S4** The preparation of specific electrolytes.

**Table S5.** Specific capacity (C g<sup>-1</sup>) and cycling retention (%) of the 8<sup>#</sup> electrode in A electrolytes with different concentrations of  $[\text{Fe}(\text{CN})_6]^{3-}$  additives.

**Table S6** Specific capacity (C g<sup>-1</sup>) and cycling retention (%) of the AC electrode in A electrolytes with different concentrations of  $[\text{Cu}(\text{NH}_3)_4]^{2+}$  additives.

**Table S7** The active mass ratios of AC anode/811-8<sup>#</sup> cathode for SCs

**Table S8** The specific electrolytes of AC anode and 811-8<sup>#</sup> cathode for SCs

**Table S9** Ragone and cycling behavior of SCs at room temperature.

**Table S10.** A comparison for the performance of the SCs in the study with some reported SCs.

**Table S11** Ragone and cycling behavior of SCs at low and high temperatures.

**Table S12** Chemicals, reagents and materials used in the study.

**References**

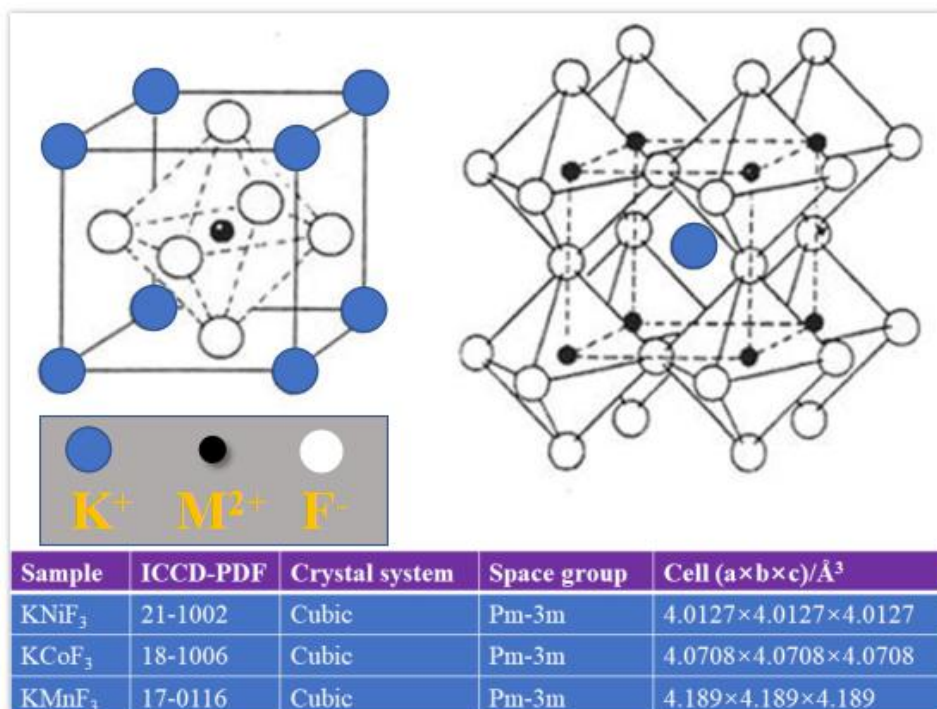

**Fig. S1** The crystalline structures of perovskite  $KMF_3$  and crystalline parameters for  $KNiF_3$ ,  $KCoF_3$  and  $KMnF_3$ .

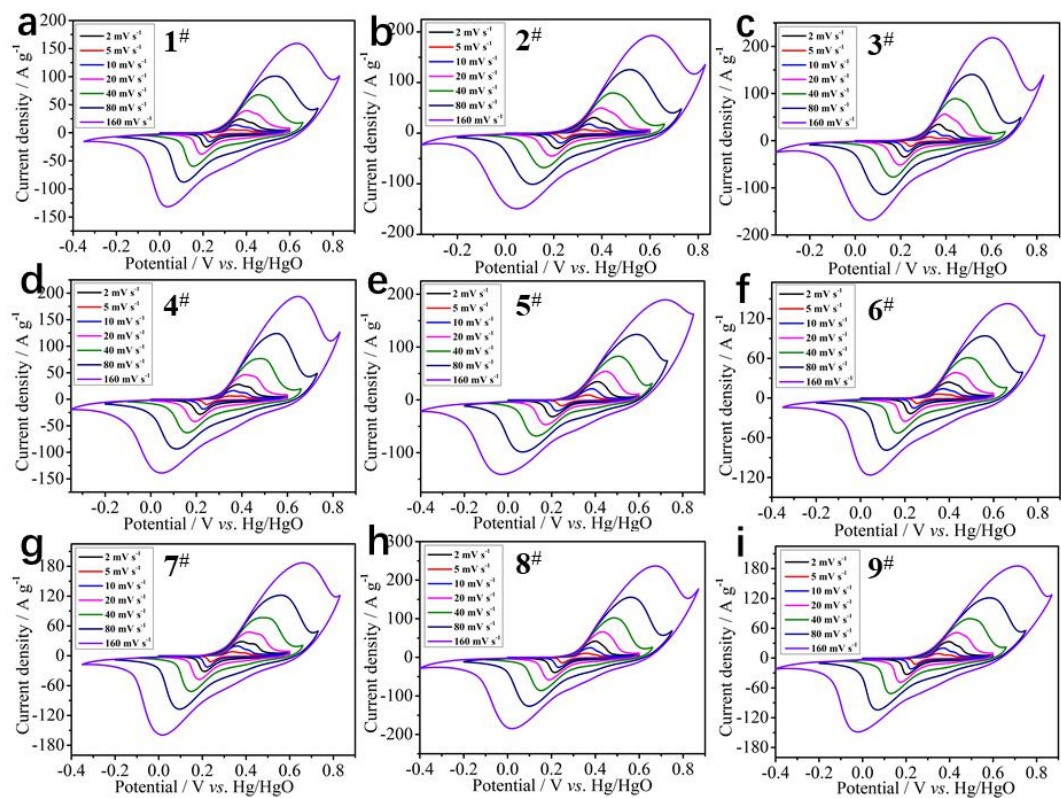

**Fig. S2** Performance of single electrode: CV plots at 2-160  $\text{mV s}^{-1}$  of 1#-9# samples

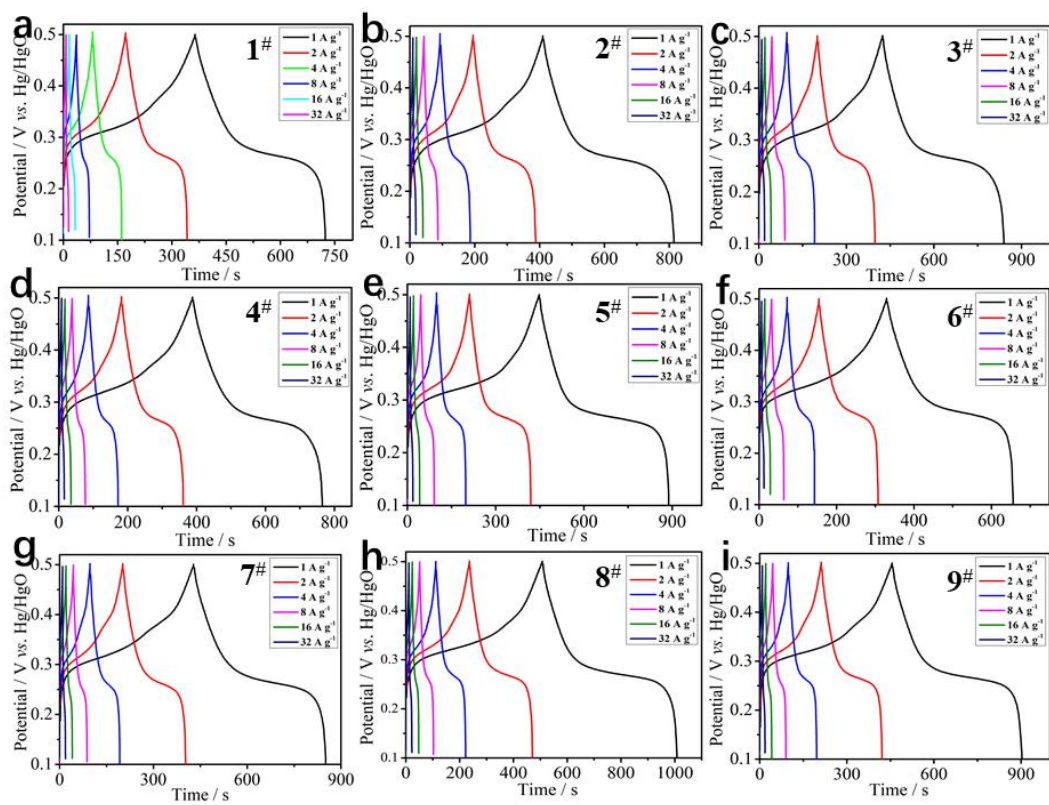

**Fig. S3** Performance of single electrode: GCD curves at 1–32 A g<sup>-1</sup> of 1#-9# samples

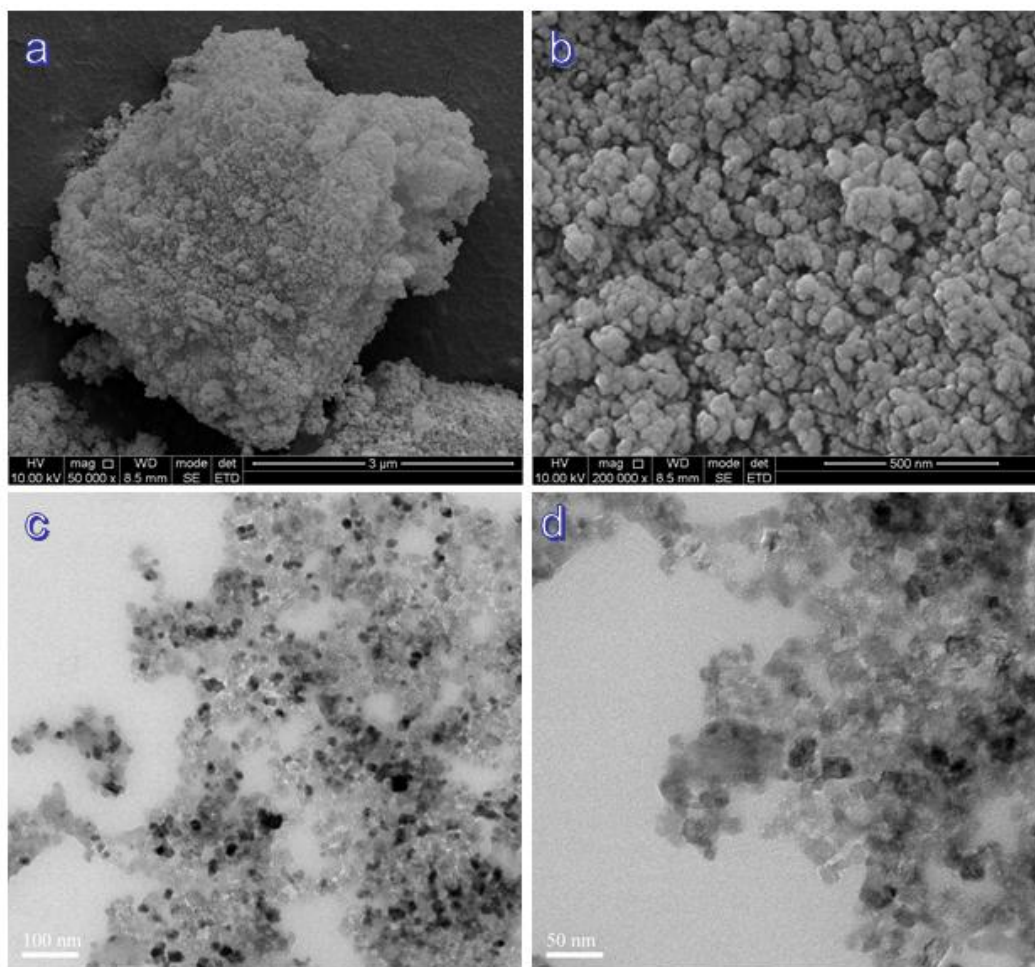

**Fig. S4** SEM (a, b) and TEM (c, d) images of the 8<sup>#</sup> samples



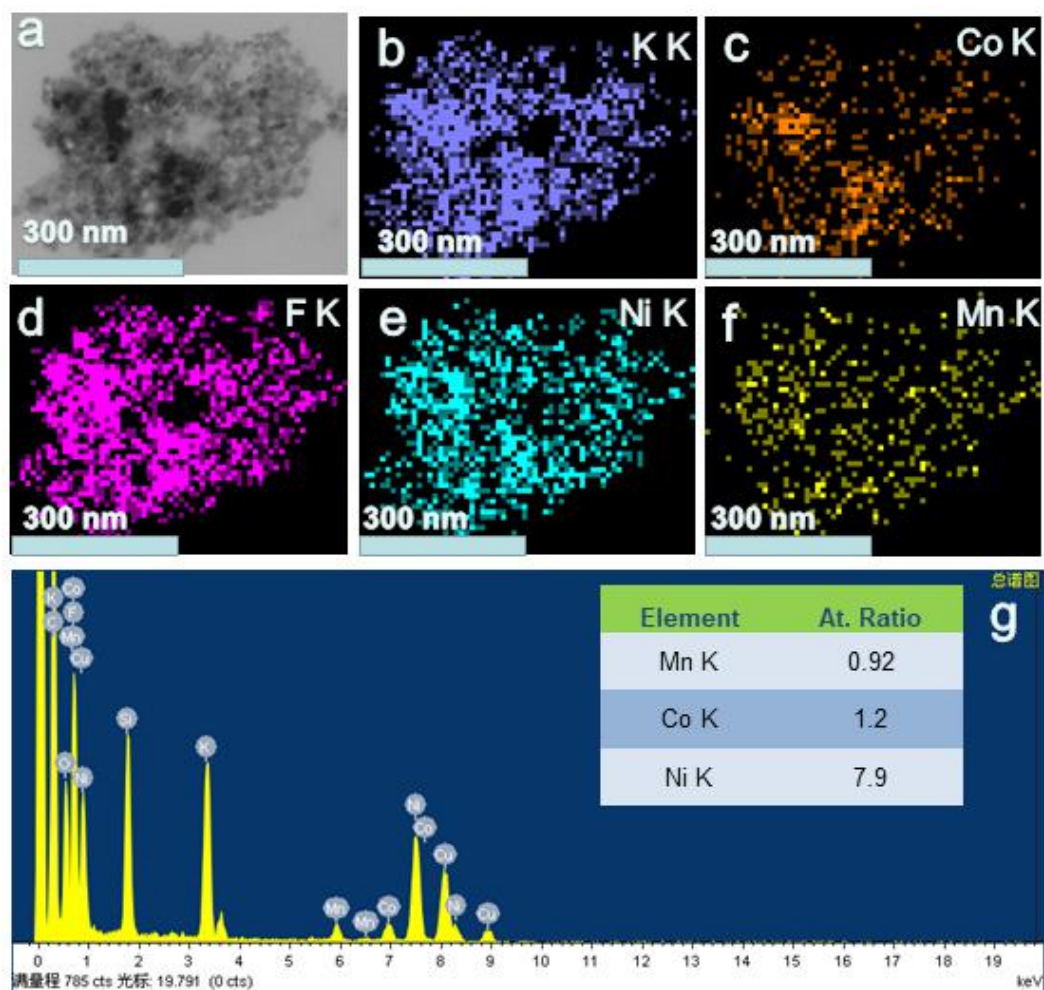

Fig. S5 TEM-mapping (a-f) images and EDS data (g) of the 8<sup>#</sup> sample.

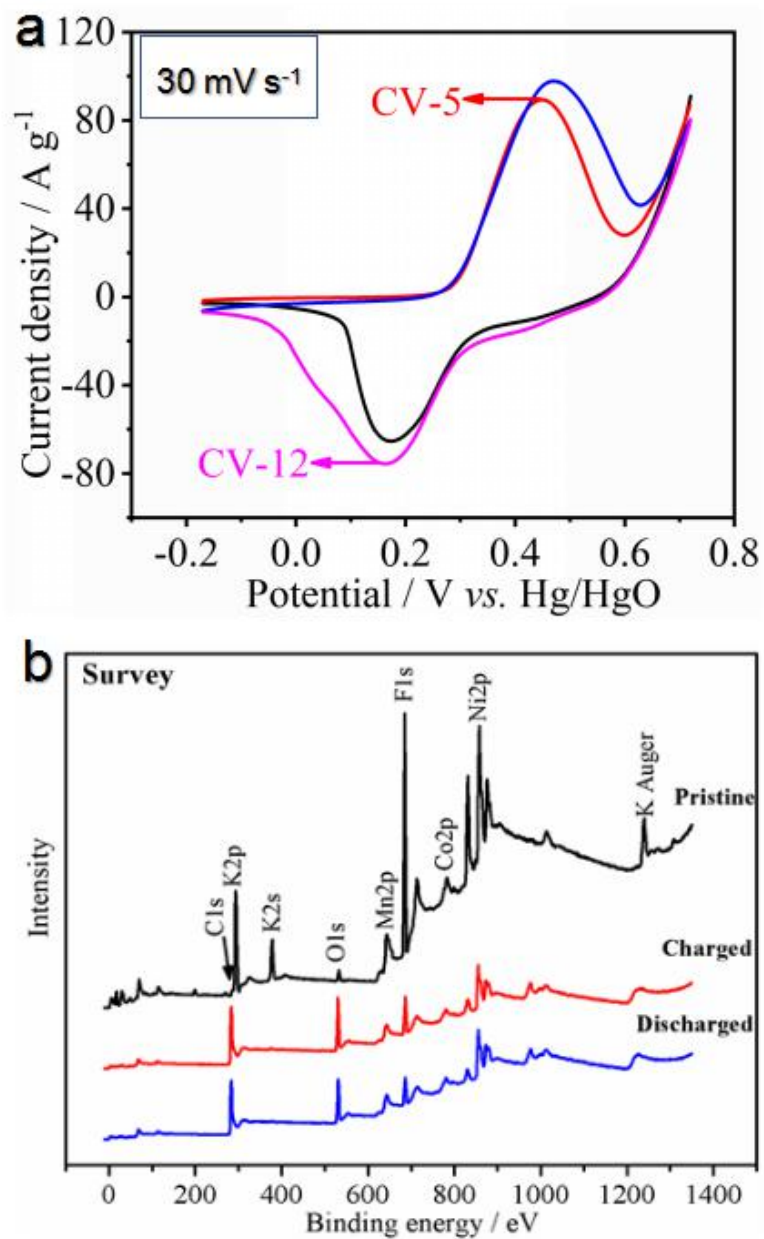

**Fig. S6** The typical 5<sup>th</sup> / 12<sup>th</sup> segments of CV scans at 30 mV s<sup>-1</sup> for *ex situ* XPS tests (a) and XPS survey scans in pristine, fully charged and discharged states (after the 5<sup>th</sup> / 12<sup>th</sup> segments of CV tests at 30 mV s<sup>-1</sup>) of the 8<sup>#</sup> electrode.

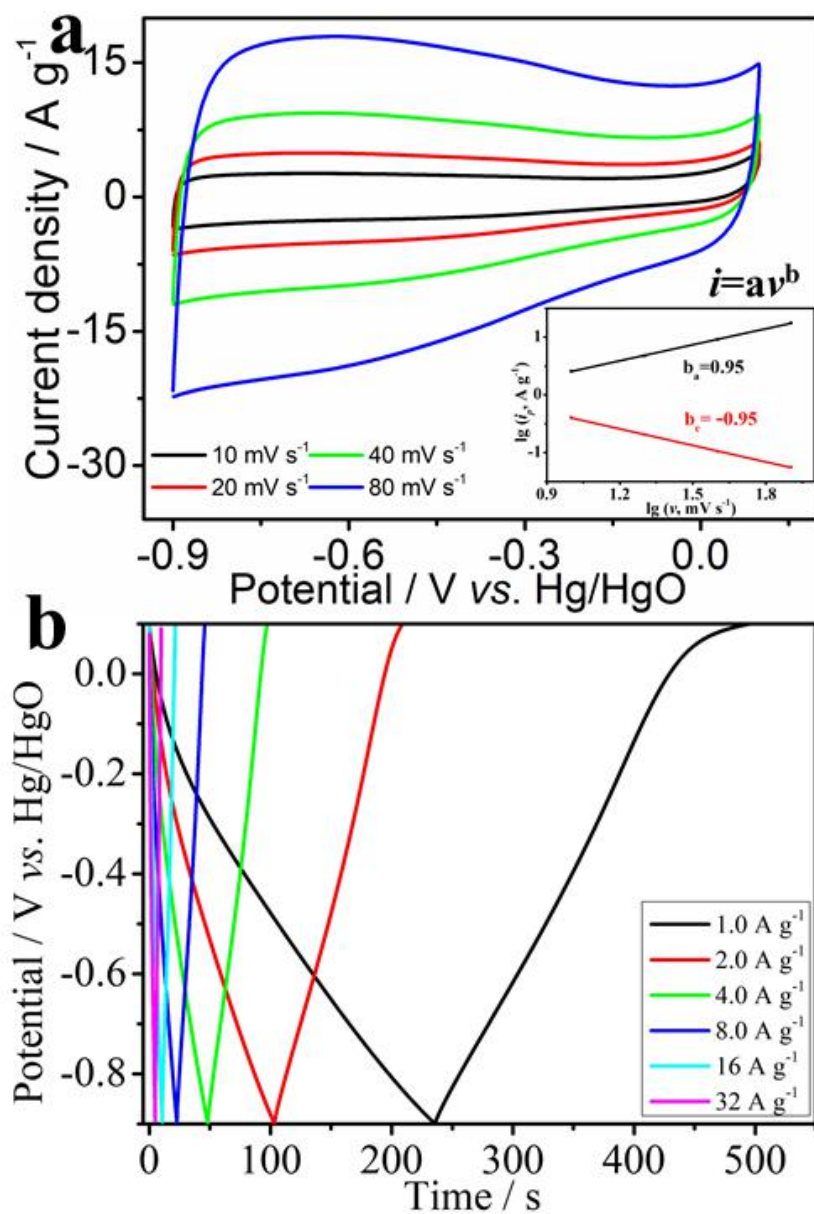

**Fig. S7** Performance of AC single electrode: CV plots at 10–80  $\text{mV s}^{-1}$  (inset of  $\lg v$ - $\lg i$ ) (a) and GCD curves at 1–32  $\text{A g}^{-1}$  (b) of AC electrode.

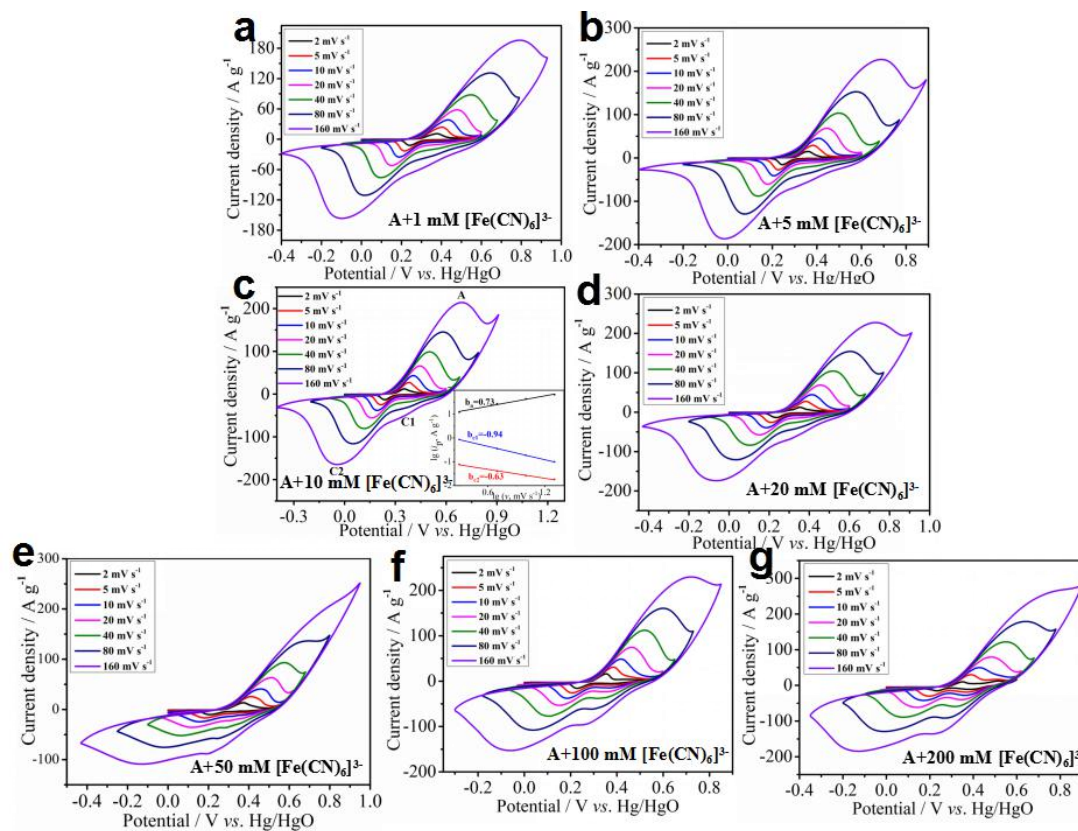

**Fig. S8** CV plots at 2-160  $\text{mV s}^{-1}$  of the 8<sup>#</sup> electrode in 3 M KOH+0.5 M LiOH (A) electrolytes with different concentrations of  $[\text{Fe}(\text{CN})_6]^{3-}$  additive (the inset of **Fig.S8c** shows the plots of  $\lg v_p - \lg i_p$  in A electrolytes and 10 mM  $[\text{Fe}(\text{CN})_6]^{3-}$  additive).

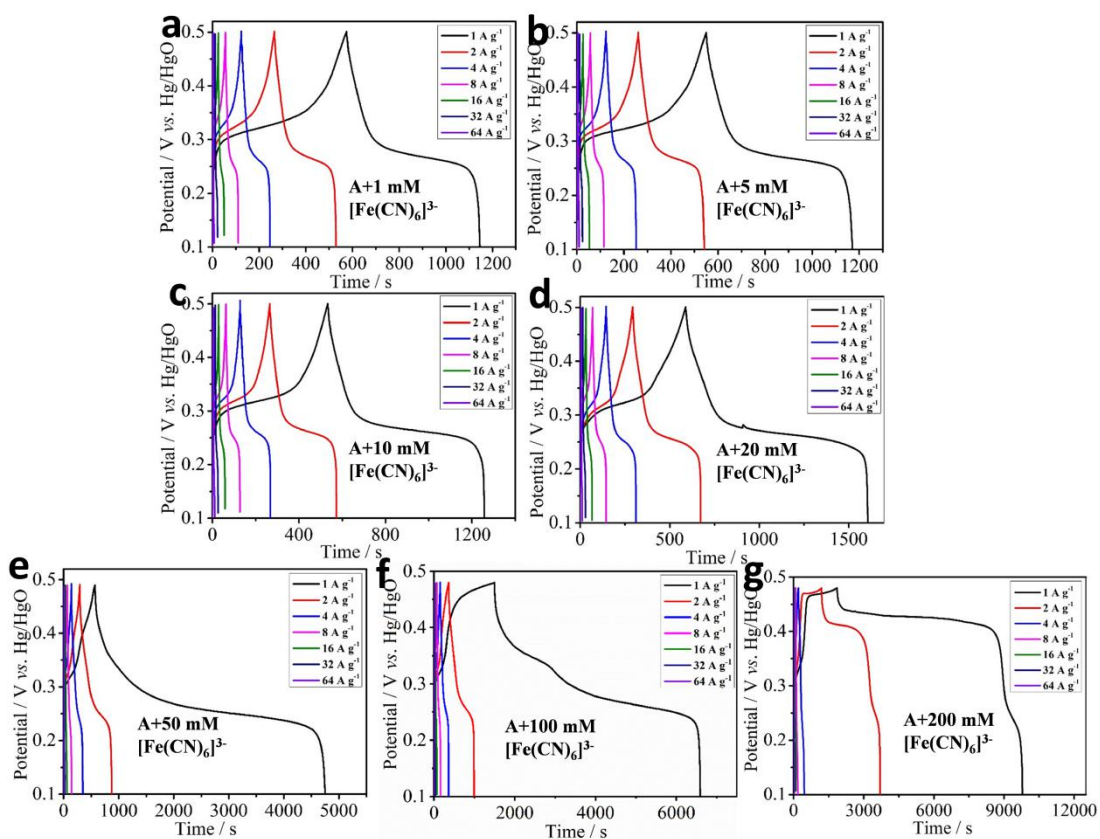

**Fig. S9** GCD curves at 1-64 A g<sup>-1</sup> of the 8<sup>#</sup> electrode in 3 M KOH+0.5 M LiOH (A) electrolytes with different concentrations of [Fe(CN)<sub>6</sub>]<sup>3-</sup> additives.

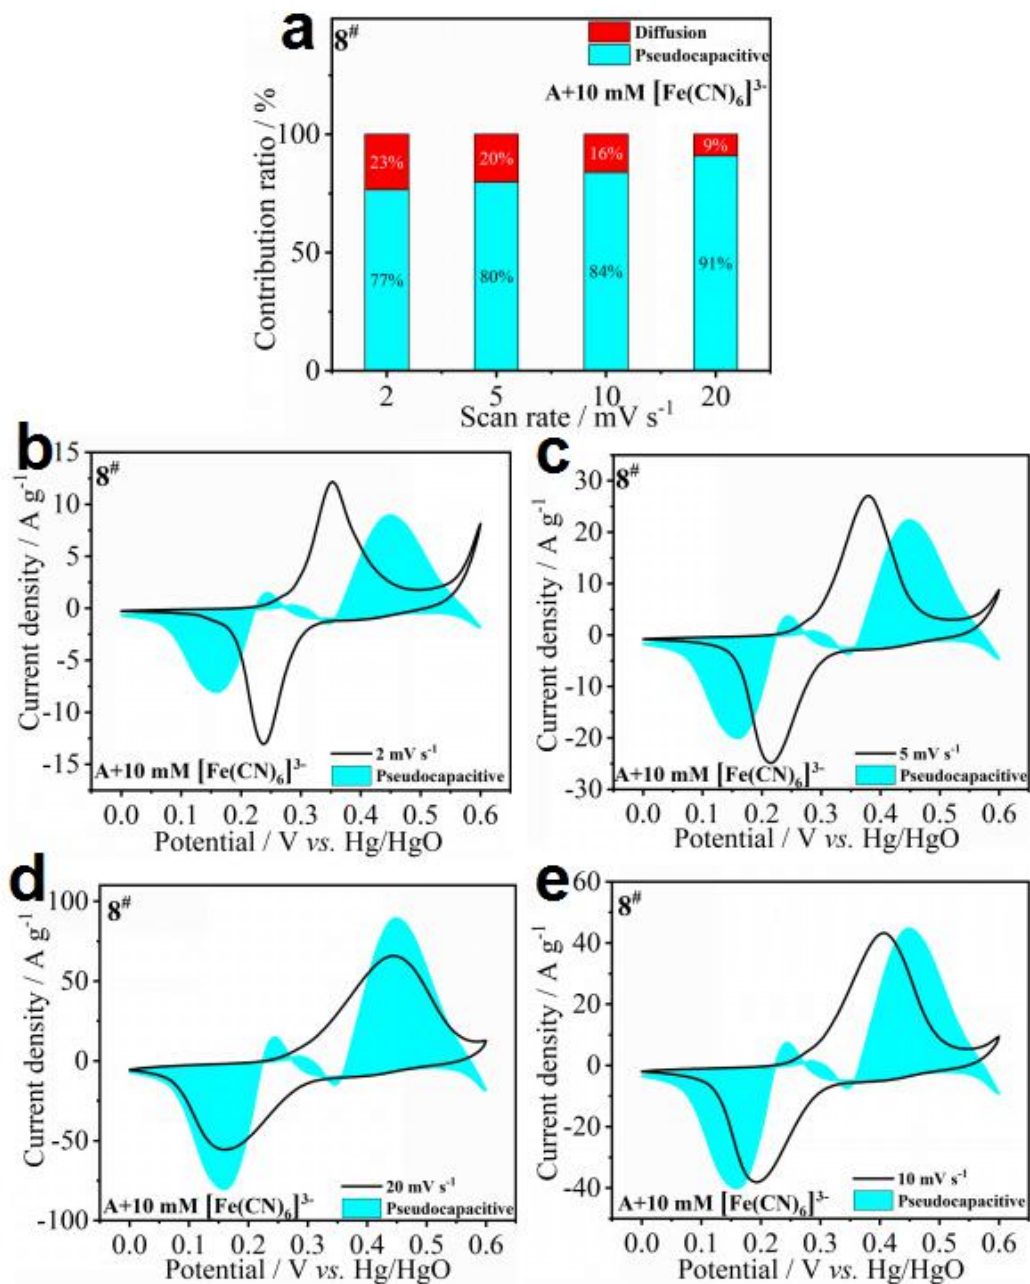

**Fig. S10** Pseudocapacitive/diffusion contribution ratio (a) and the area for pseudocapacitive part in the CV plots at 2-20  $\text{mV s}^{-1}$  (b-e) of the 8<sup>#</sup> electrode in 3 M KOH+0.5 M LiOH (A) electrolytes with 10 mM  $[\text{Fe}(\text{CN})_6]^{3-}$  additives.

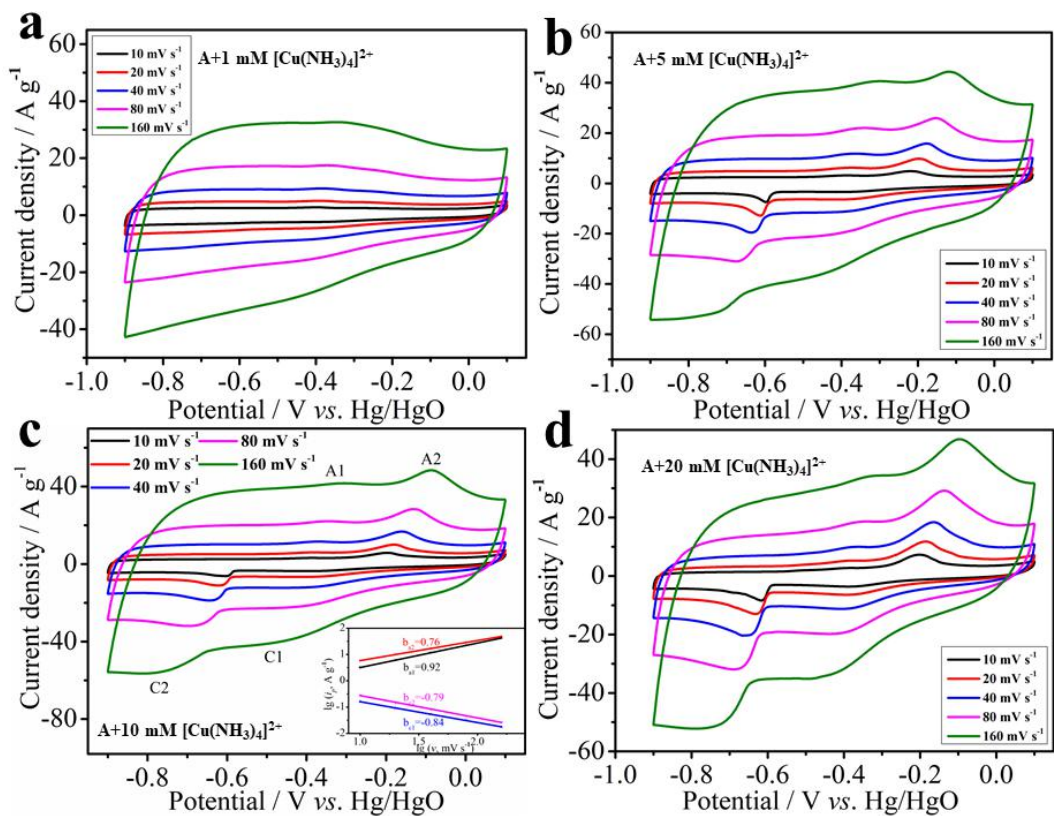

**Fig. S11** CV plots at 10-160 mV s<sup>-1</sup> of the AC electrode in 3 M KOH+0.5 M LiOH (A) electrolytes with different concentrations of [Cu(NH<sub>3</sub>)<sub>4</sub>]<sup>2+</sup> additive (the inset of Fig.S10c shows the plots of  $\lg v - \lg i$  in A+10 mM [Cu(NH<sub>3</sub>)<sub>4</sub>]<sup>2+</sup>).

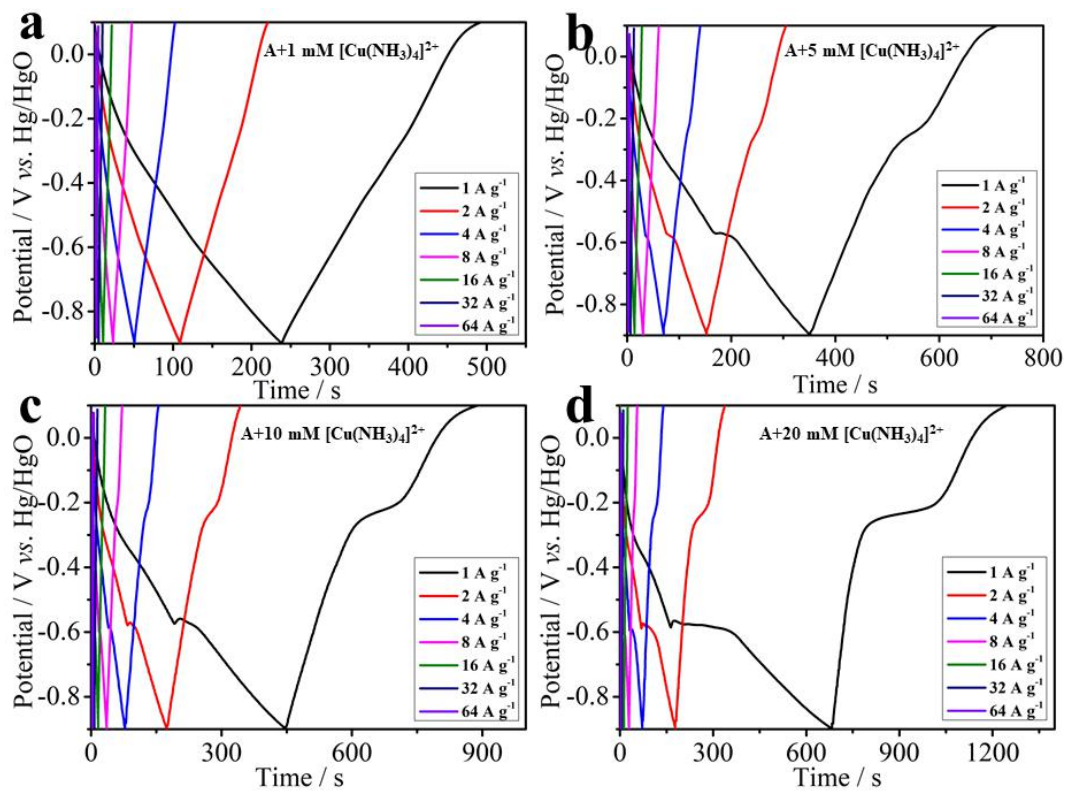

**Fig. S12** GCD curves at 1-64  $\text{A g}^{-1}$  of the AC electrode in 3 M KOH+0.5 M LiOH (A) with different concentrations of  $[\text{Cu}(\text{NH}_3)_4]^{2+}$  additives.



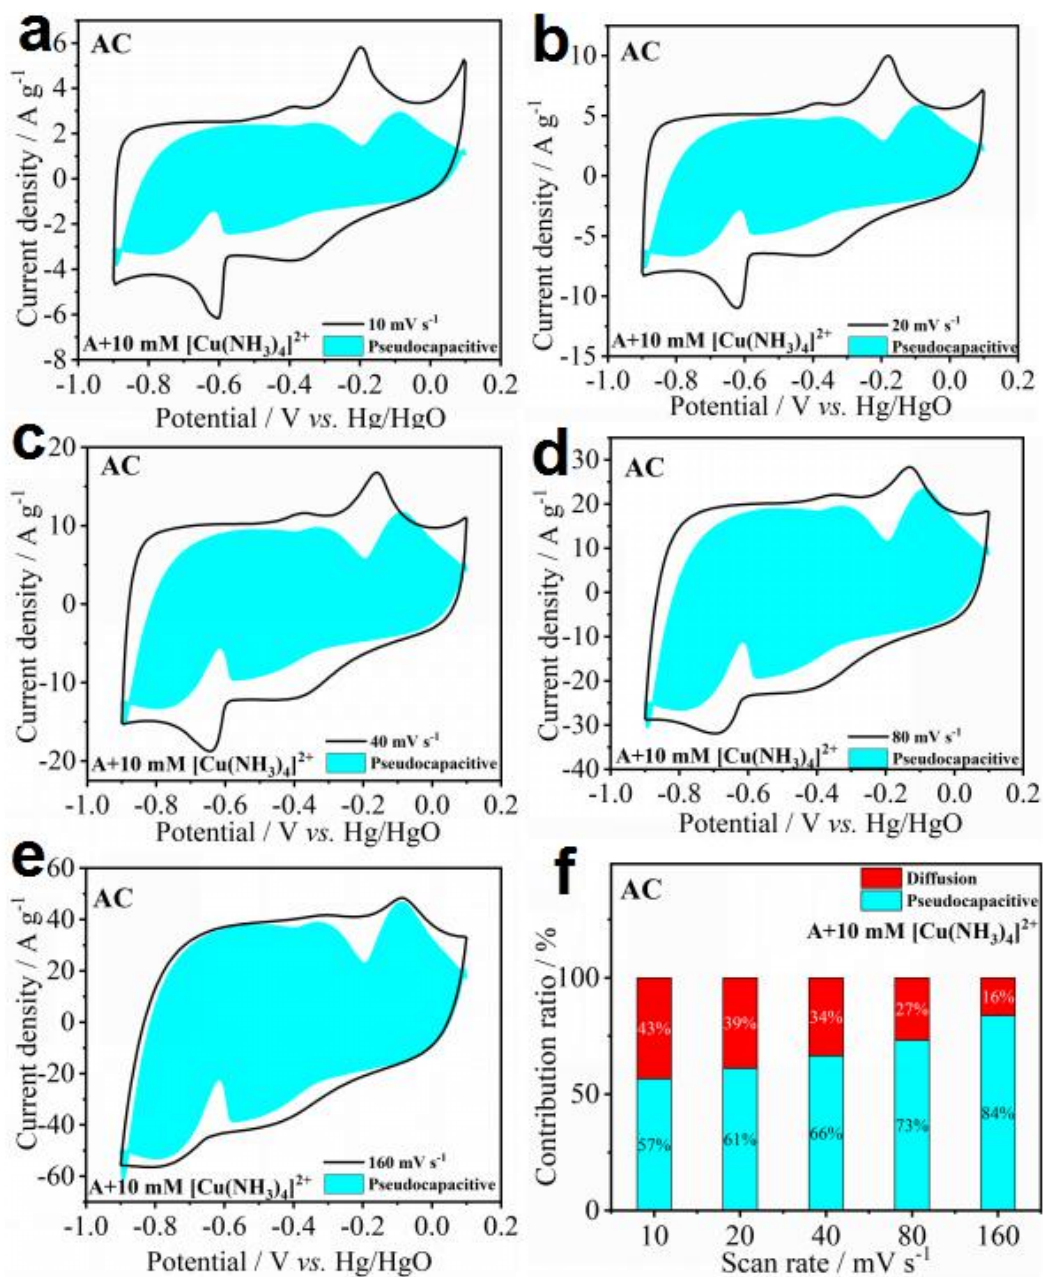

**Fig. S13** The area for pseudocapacitive part in the CV plots (a-e) and pseudocapacitive/diffusion contribution ratio (f) at 10-160 mV s<sup>-1</sup> of the AC electrode in 3 M KOH+0.5 M LiOH (A) electrolytes with 10 mM [Cu(NH<sub>3</sub>)<sub>4</sub>]<sup>2+</sup> additives.

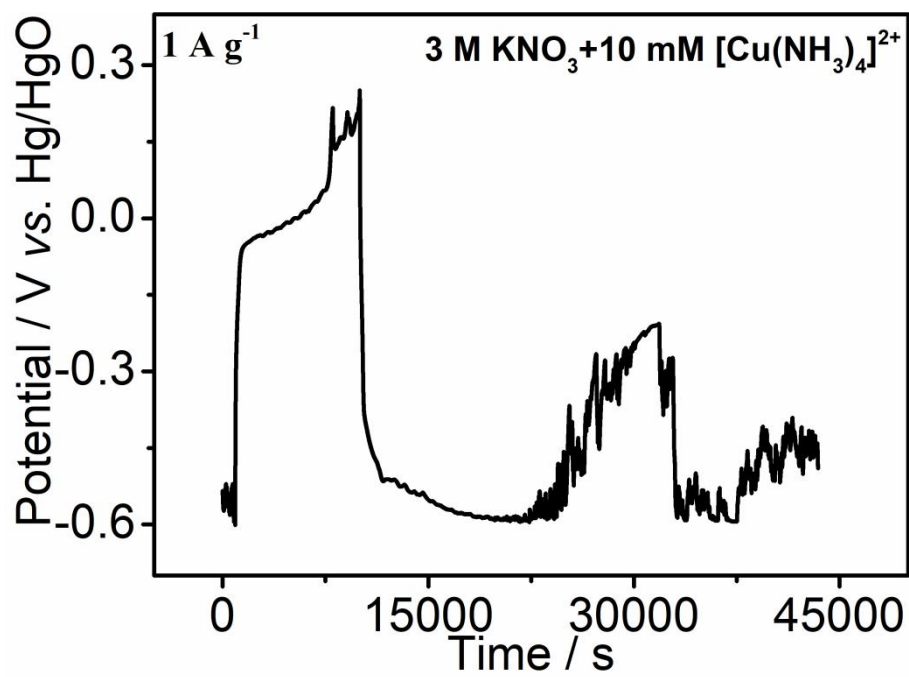

**Fig.S14** GCD curves at 1 A g<sup>-1</sup> of AC electrode in 3 M KNO<sub>3</sub> (C) with 10 mM [Cu(NH<sub>3</sub>)<sub>4</sub>]<sup>2+</sup> additive.

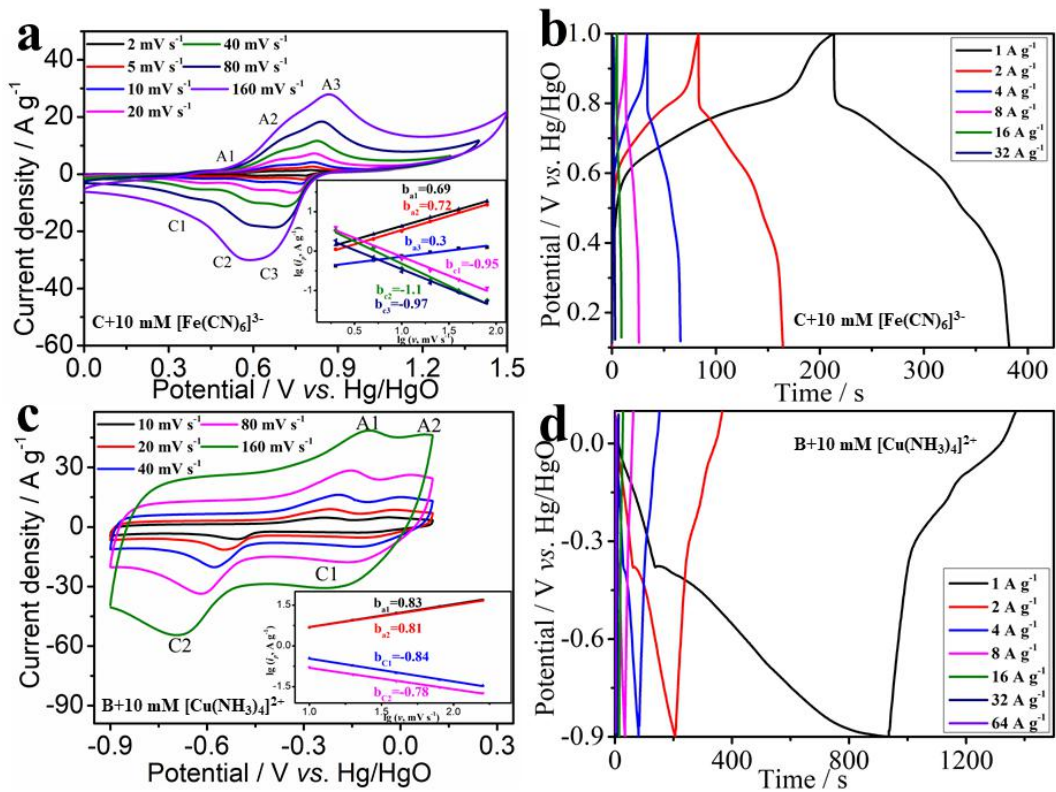

**Fig. S15** The CV plots at 2-160  $\text{mV s}^{-1}$  (inset shows the plots of  $\lg v$ - $\lg i$ ) (a) and GCD curves at 1-32  $\text{A g}^{-1}$  (b) of the 8<sup>#</sup> electrode in 3 M  $\text{KNO}_3$  (C)+10 mM  $\text{K}_3[\text{Fe}(\text{CN})_6]$ ; the CV plots at 10-160  $\text{mV s}^{-1}$  (Inset shows the plots of  $\lg v$ - $\lg i$ ) (c) and GCD curves at 1-64  $\text{A g}^{-1}$  (d) of AC electrode in 3 M  $\text{KCl}$  (B)+10 mM  $[\text{Cu}(\text{NH}_3)_4]^{2+}$ .

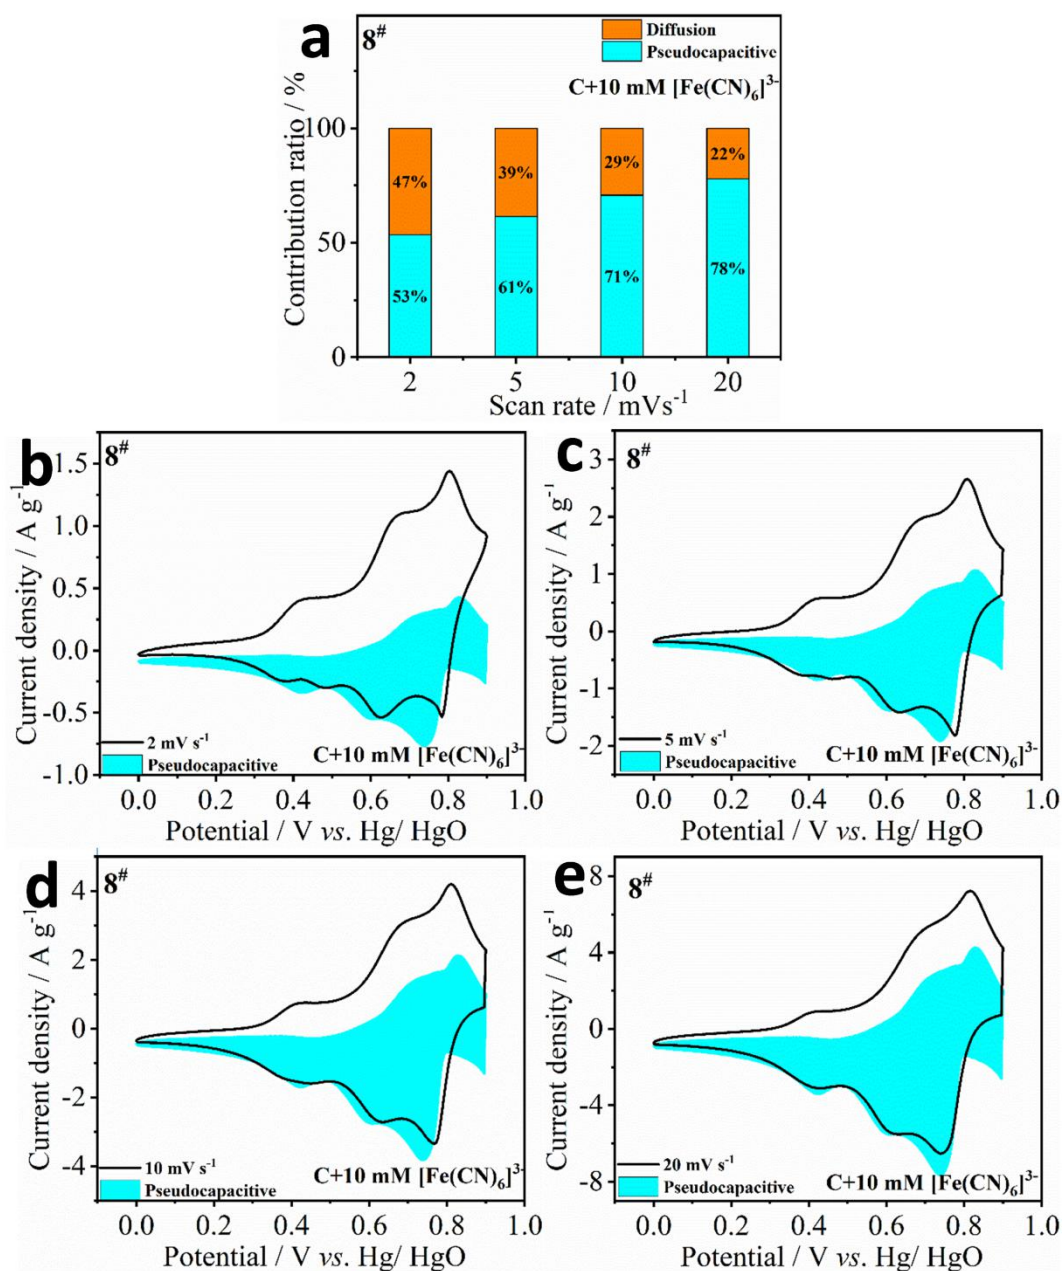

**Fig.S16** Pseudocapacitive/diffusion contribution ratio (a) and the area for pseudocapacitive part in the CV plots at 2-20 mV s<sup>-1</sup> of the 8<sup>#</sup> electrode in 3 M KNO<sub>3</sub> (C) electrolytes with 10 mM [Fe(CN)<sub>6</sub>]<sup>3-</sup> additives.

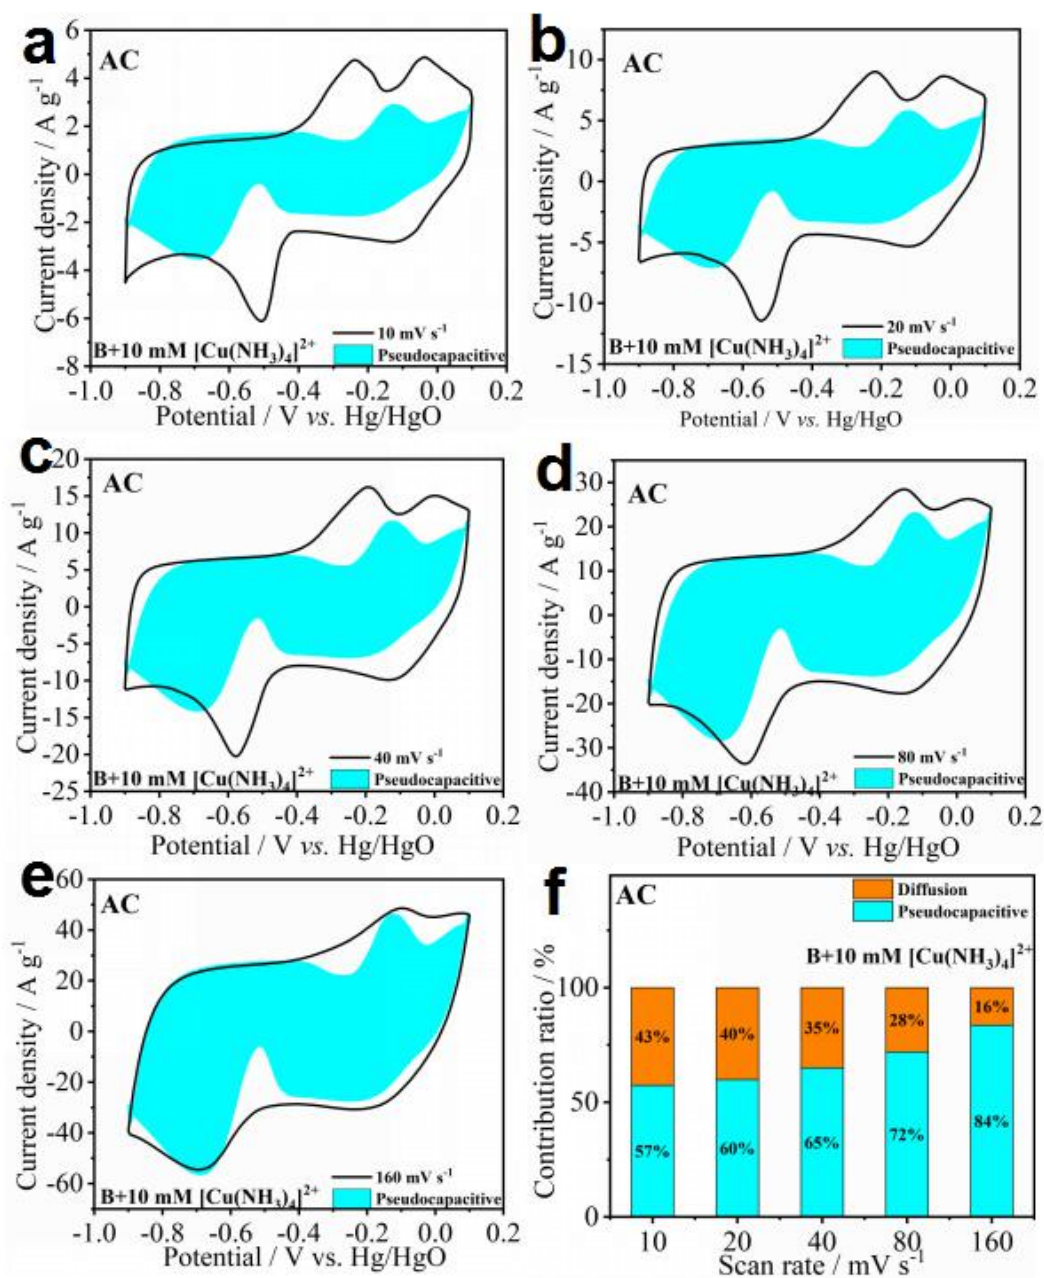

**Fig.S17** The area for pseudocapacitive part in the CV plots (a-e) and pseudocapacitive/diffusion contribution ratio (f) at 10-160 mV s<sup>-1</sup> of the AC electrode in 3 M KCl (B) electrolytes with 10 mM [Cu(NH<sub>3</sub>)<sub>4</sub>]<sup>2+</sup> additives.

A: 3 M KOH+0.5 M LiOH    B: 3 M KCl    C: 3 M KNO<sub>3</sub>

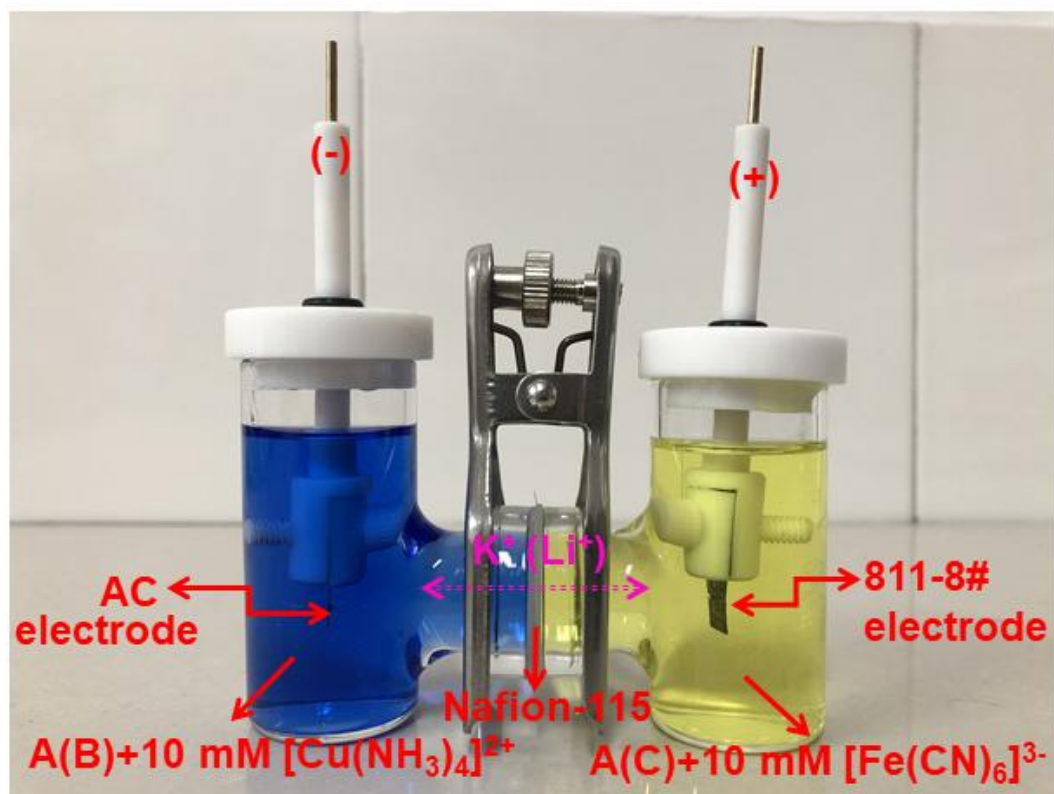

**Fig. S18** The detail drawing for H-type SC structure

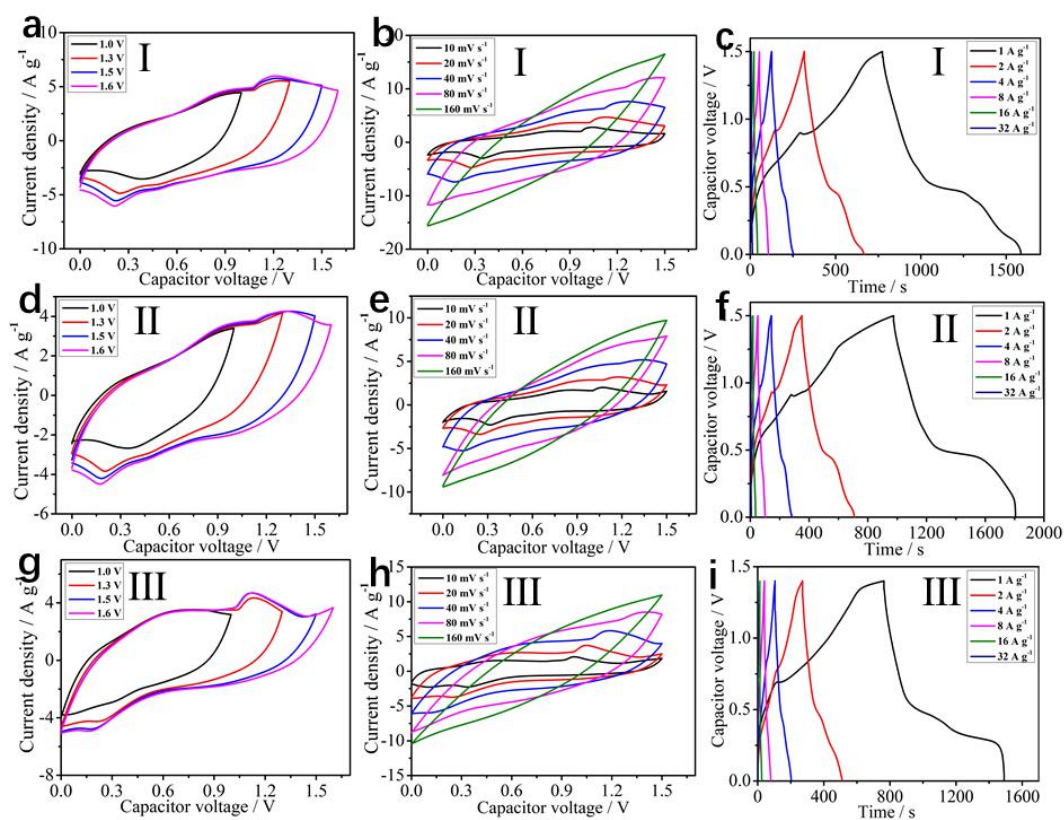

**Fig. S19** The CV window (a, d, g), CV plots of 10-160  $\text{mV s}^{-1}$  (b, e, h) and GCD curves at 1–32  $\text{A g}^{-1}$  (c, f, i) of I , II and III H-type capacitors  
 I : AC ( A+10 mM  $[\text{Cu}(\text{NH}_3)_4]^{2+}$  //811-8# ( A+10 mM  $[\text{Fe}(\text{CN})_6]^{3-}$ )  
 II : AC ( A+10 mM  $[\text{Cu}(\text{NH}_3)_4]^{2+}$  // 811-8# ( A+20 mM  $[\text{Fe}(\text{CN})_6]^{3-}$ )  
 III: AC ( B+10 mM  $[\text{Cu}(\text{NH}_3)_4]^{2+}$  // 811-8# ( A+10 mM  $[\text{Fe}(\text{CN})_6]^{3-}$ )

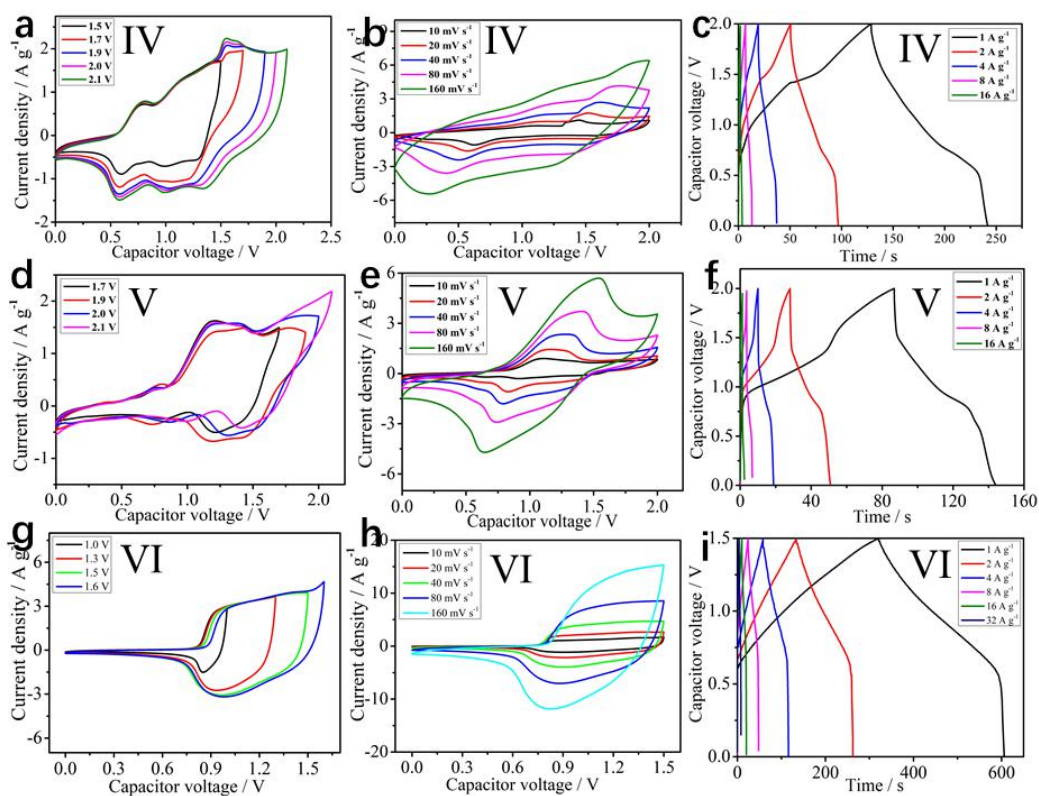

**Fig. S20** The CV window (a, d, g), CV plots of 10-160  $\text{mV s}^{-1}$  (b, e, h) and GCD curves at 1–32  $\text{A g}^{-1}$  (c, f, i) of IV, V and VI H-type capacitors  
 IV: AC (A+10 mM  $[\text{Cu}(\text{NH}_3)_4]^{2+}$ ) // 811-8# (C+10 mM  $[\text{Fe}(\text{CN})_6]^{3-}$ )  
 V: AC (B+10 mM  $[\text{Cu}(\text{NH}_3)_4]^{2+}$ ) // 811-8# (C+10 mM  $[\text{Fe}(\text{CN})_6]^{3-}$ )  
 VI: AC (A) // 811-8# (A)



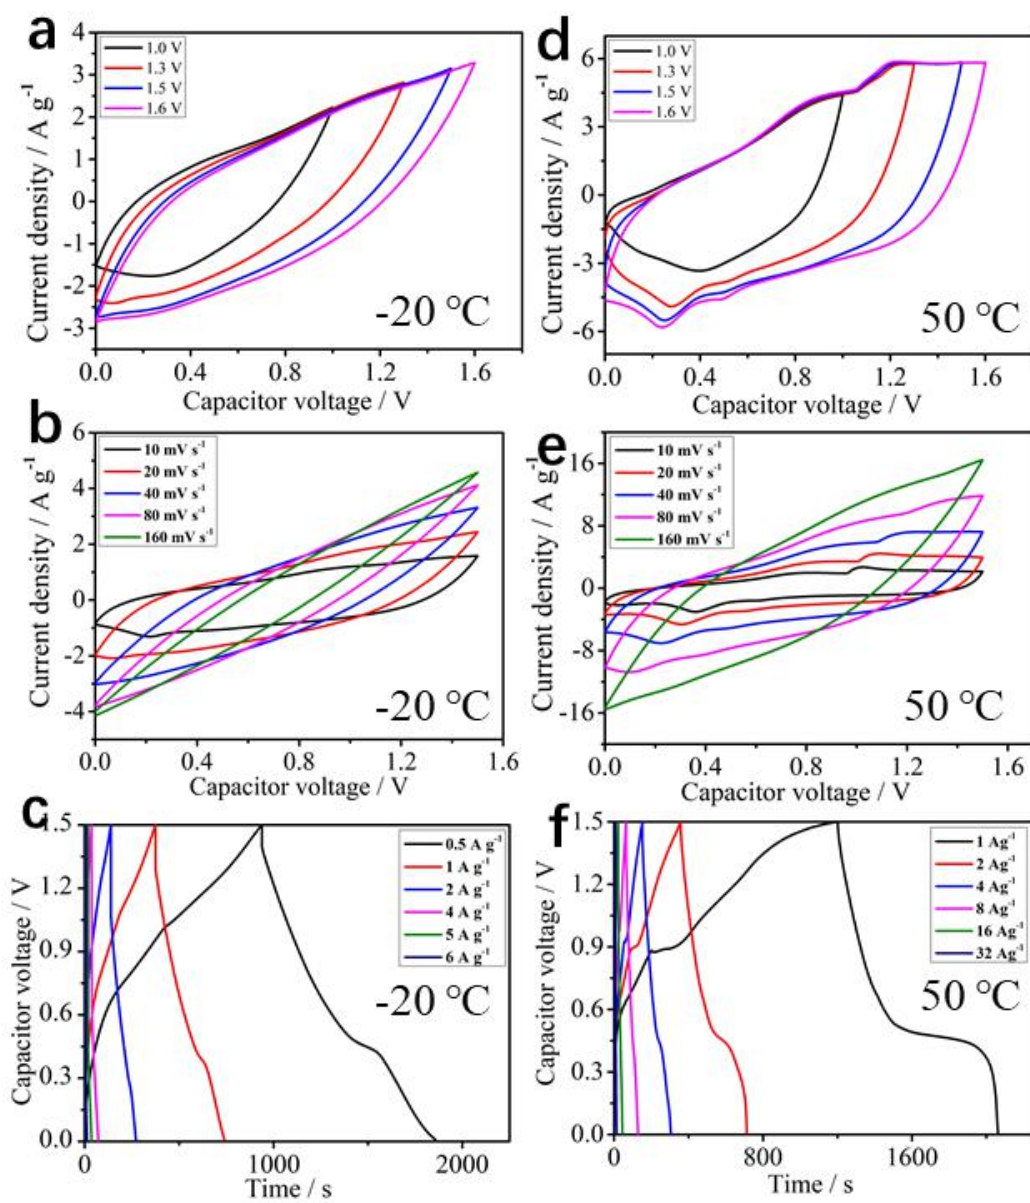

**Fig. S21** The CV window (a, d), CV plots of 10-160 mV s<sup>-1</sup> (b, e) and GCD curves at 1–32 A g<sup>-1</sup> (c, f) of I H-type capacitor with high and low temperatures.

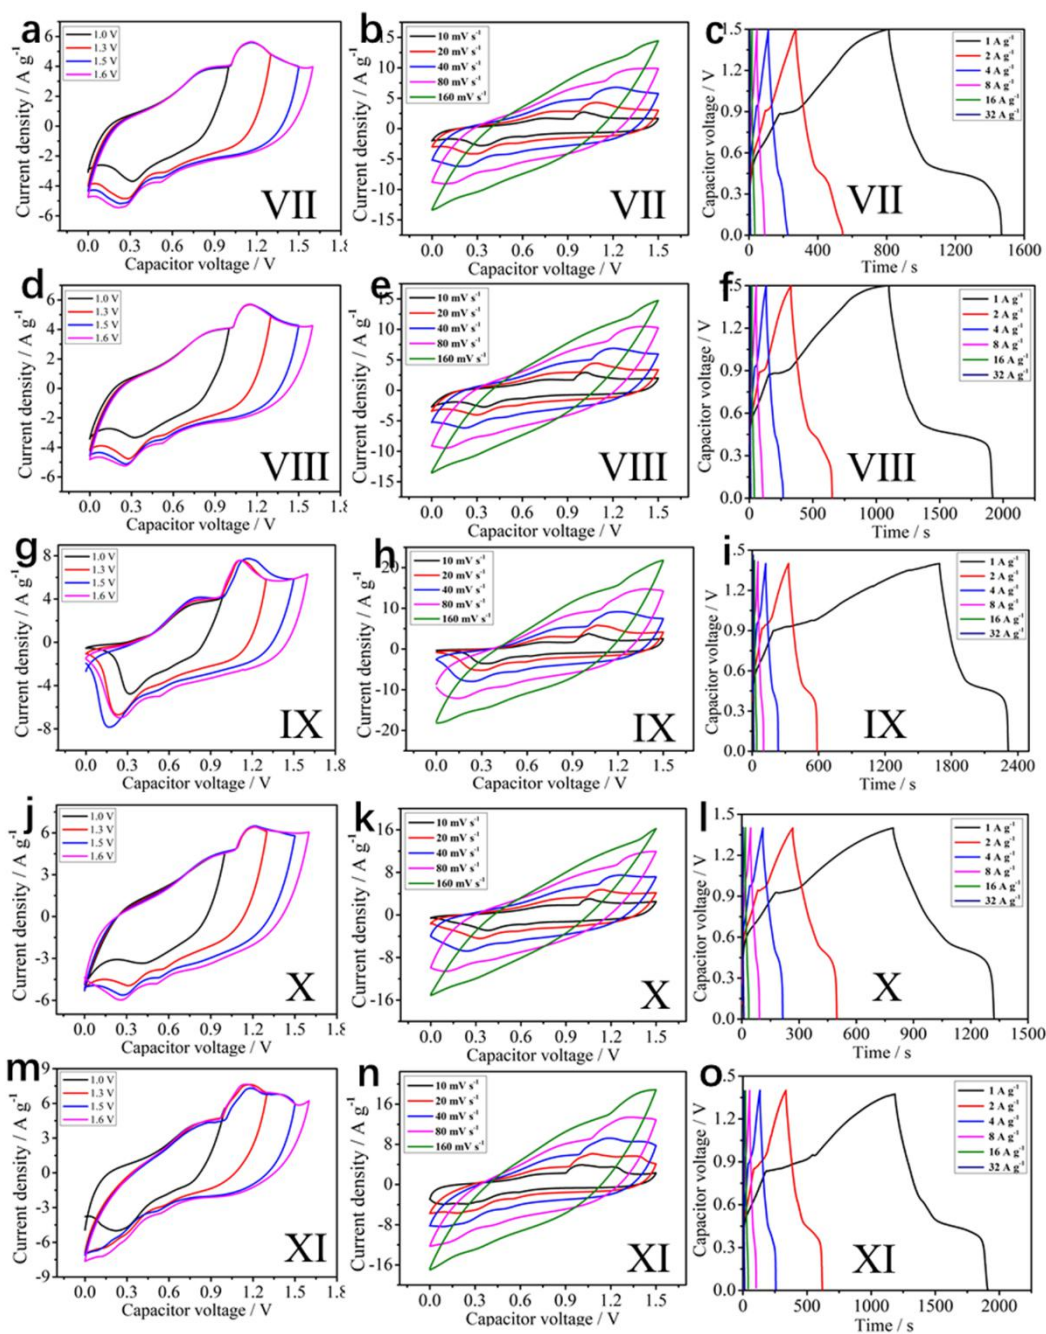

**Fig. S22** The CV window (a, d, g, j, m), CV plots of 10-160  $\text{mV s}^{-1}$  (b, e, h, k, n) and GCD curves at 1–32  $\text{A g}^{-1}$  (c, f, i, l, o) of VII-XI H-type capacitors under high temperature.

VII: AC (A+10 mM  $[\text{Cu}(\text{NH}_3)_4]^{2+}$ ) // 811-8# (A+10 mM  $[\text{Fe}(\text{CN})_6]^{3-}$ +0.5%  $\text{Na}_2\text{MoO}_4$ )

VIII: AC (A+10 mM  $[\text{Cu}(\text{NH}_3)_4]^{2+}$ ) // 811-8# (A+10 mM  $[\text{Fe}(\text{CN})_6]^{3-}$ +1.0%  $\text{Na}_2\text{MoO}_4$ )

IX: AC (A+10 mM  $[\text{Cu}(\text{NH}_3)_4]^{2+}$ ) //811-8# (A+10 mM  $[\text{Fe}(\text{CN})_6]^{3-}$ +1.5%  $\text{Na}_2\text{MoO}_4$ )

X: AC (A+10 mM  $[\text{Cu}(\text{NH}_3)_4]^{2+}$ ) // 811-8# (A'+10 mM  $[\text{Fe}(\text{CN})_6]^{3-}$ +1.0%  $\text{Na}_2\text{MoO}_4$ )

XI: AC (A+10 mM  $[\text{Cu}(\text{NH}_3)_4]^{2+}$ ) // 811-8# (A''+10 mM  $[\text{Fe}(\text{CN})_6]^{3-}$ +1.0%  $\text{Na}_2\text{MoO}_4$ )

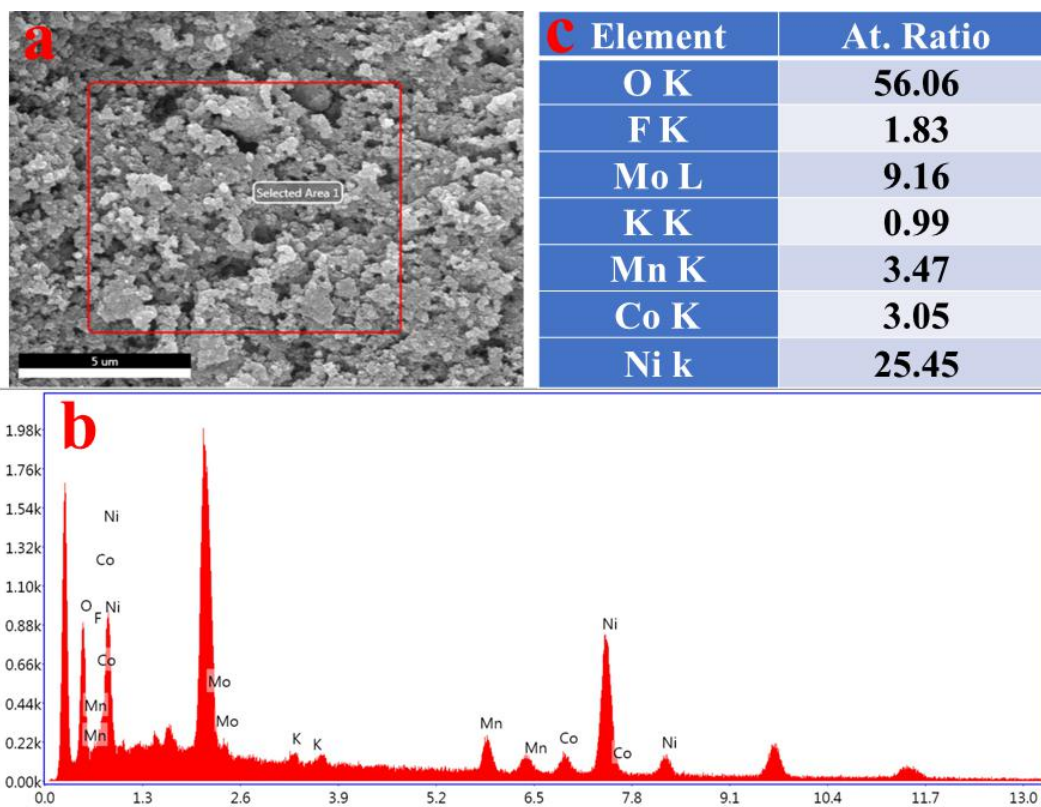

**Fig. S23** The EDS data of the 8# cathode in the VIII H-type capacitor [AC (A+10 mM  $[\text{Cu}(\text{NH}_3)_4]^{2+}$ ) // 811-8# (A+10 mM  $[\text{Fe}(\text{CN})_6]^{3-}$ +1.0%  $\text{Na}_2\text{MoO}_4$ )] after the cycling tests under high temperature.

**Table S1** The orthogonal analysis of KNCMF-811(1<sup>#</sup>-9<sup>#</sup>) electrodes in A electrolytes

| Samples                               | Experimental factors |       |       |       | Experimental data                         |          |                     |
|---------------------------------------|----------------------|-------|-------|-------|-------------------------------------------|----------|---------------------|
|                                       | A                    | B     | C     | D     | Specific capacity<br>(C g <sup>-1</sup> ) | Rate (%) | Cycle retention (%) |
| 1 <sup>#</sup>                        | A1                   | B1    | C1    | D1    | 360                                       | 64       | 73                  |
| 2 <sup>#</sup>                        | A1                   | B2    | C2    | D2    | 404                                       | 72.9     | 64                  |
| 3 <sup>#</sup>                        | A1                   | B3    | C3    | D3    | 416                                       | 70.8     | 63                  |
| 4 <sup>#</sup>                        | A2                   | B1    | C2    | D3    | 377                                       | 66.9     | 48                  |
| 5 <sup>#</sup>                        | A2                   | B2    | C3    | D1    | 440                                       | 67       | 47                  |
| 6 <sup>#</sup>                        | A2                   | B3    | C1    | D2    | 327                                       | 60.9     | 59                  |
| 7 <sup>#</sup>                        | A3                   | B1    | C3    | D2    | 423                                       | 70.7     | 67                  |
| 8 <sup>#</sup>                        | A3                   | B2    | C1    | D3    | 501                                       | 71       | 62                  |
| 9 <sup>#</sup>                        | A3                   | B3    | C2    | D1    | 447                                       | 65.1     | 44                  |
| Specific capacitance                  | K1                   | 1180  | 1160  | 1188  | 1247                                      |          |                     |
|                                       | K2                   | 1144  | 1345  | 1228  | 1154                                      |          |                     |
|                                       | K3                   | 1371  | 1190  | 1279  | 1294                                      |          |                     |
|                                       | k1                   | 393.3 | 386.7 | 396   | 415.7                                     |          |                     |
|                                       | k2                   | 381.3 | 448.3 | 409.3 | 384.7                                     |          |                     |
|                                       | k3                   | 457   | 396.7 | 426.3 | 431.3                                     |          |                     |
|                                       | Range                | 75.7  | 61.6  | 30.3  | 46.6                                      |          |                     |
| Rate (%)                              | K1                   | 207.7 | 201.6 | 195.9 | 196.1                                     |          |                     |
|                                       | K2                   | 194.8 | 210.9 | 204.9 | 204.5                                     |          |                     |
|                                       | K3                   | 206.8 | 196.8 | 208.5 | 208.7                                     |          |                     |
|                                       | k1                   | 69.2  | 67.2  | 65.3  | 65.37                                     |          |                     |
|                                       | k2                   | 64.9  | 70.3  | 68.3  | 68.17                                     |          |                     |
|                                       | k3                   | 68.9  | 65.6  | 69.5  | 69.57                                     |          |                     |
|                                       | Range                | 4.3   | 4.7   | 4.2   | 4.2                                       |          |                     |
| Cycle retention (%)                   | K1                   | 200.0 | 188.0 | 194.0 | 164.0                                     |          |                     |
|                                       | K2                   | 154.0 | 173.0 | 156.0 | 190.0                                     |          |                     |
|                                       | K3                   | 173.0 | 166.0 | 177.0 | 173.0                                     |          |                     |
|                                       | k1                   | 66.7  | 62.7  | 64.7  | 54.7                                      |          |                     |
|                                       | k2                   | 51.3  | 57.7  | 52.0  | 63.3                                      |          |                     |
|                                       | k3                   | 57.7  | 55.3  | 59.0  | 57.7                                      |          |                     |
|                                       | Range                | 15.4  | 7.4   | 12.7  | 8.6                                       |          |                     |
| <b>Optimal experimental condition</b> |                      |       |       |       | <b>A3B2C1D3 (8<sup>#</sup>)</b>           |          |                     |

A: n(total metal salt ):n(KF), A1 = 1:2, A2 = 1:2.5, A3 = 1:3.

B: Solvent, B1 = EG+EA (1:1), B2 = EG+NPA (1:1), B3 = EG+NBA (1:1), Total volume=36 mL.

C: Temperature, C1 = 160 °C, C2 = 170 °C, C3 = 180 °C.

D: Time, D1 = 6 h, D2 = 12 h, D3 = 24 h.

**Table S2** Specific capacity ( $C \text{ g}^{-1}$ ) and cycling retention (%) of the KNCMF-811 (1<sup>#</sup>-9<sup>#</sup>) and AC electrodes in A electrolytes

| Samples        | Current density/ ( $A \text{ g}^{-1}$ ) |       |       |       |       |       | Cycling Retention % /<br>$8 A \text{ g}^{-1}/10000$ cycles |
|----------------|-----------------------------------------|-------|-------|-------|-------|-------|------------------------------------------------------------|
|                | 1                                       | 2     | 4     | 8     | 16    | 32    |                                                            |
| 1 <sup>#</sup> | 360                                     | 340   | 320   | 286.4 | 259.2 | 230.4 | 73                                                         |
| 2 <sup>#</sup> | 404                                     | 386   | 372   | 343.2 | 320.4 | 294.4 | 64                                                         |
| 3 <sup>#</sup> | 416                                     | 396   | 380   | 344   | 321.9 | 294.7 | 63                                                         |
| 4 <sup>#</sup> | 377                                     | 358   | 344   | 315.2 | 281.9 | 252.2 | 48                                                         |
| 5 <sup>#</sup> | 440                                     | 416   | 396   | 365.6 | 324.8 | 294.7 | 47                                                         |
| 6 <sup>#</sup> | 327                                     | 306   | 284   | 254.4 | 230.6 | 199   | 59                                                         |
| 7 <sup>#</sup> | 423                                     | 402   | 380   | 349.6 | 326.7 | 299.2 | 67                                                         |
| 8 <sup>#</sup> | 501                                     | 468   | 444   | 411.2 | 381.8 | 355.8 | 62                                                         |
| 9 <sup>#</sup> | 447                                     | 418   | 392   | 363.3 | 321.3 | 291.2 | 44                                                         |
| AC             | 260                                     | 211.6 | 195.6 | 183.2 | 172.8 | 160   | 95                                                         |

**Table S3.** EIS fitting parameters of the 8<sup>#</sup> electrode before and after cycling test in A electrolytes.

|               | <b>Model</b>      | <b><i>L</i> (H)</b>  | <b><i>R</i><sub>ESR</sub> (Ω)</b> | <b><i>C</i> (F)</b>  | <b><i>R</i><sub>ct</sub> (Ω)</b> | <b><i>W</i> (S sec<sup>0.5</sup>)</b> | <b><i>C</i> (F)</b> | <b><math>\chi^2</math></b> |
|---------------|-------------------|----------------------|-----------------------------------|----------------------|----------------------------------|---------------------------------------|---------------------|----------------------------|
| <b>Before</b> |                   | 9.8×10 <sup>-7</sup> | 0.62                              | 1.7×10 <sup>-3</sup> | 0.53                             | 0.32                                  | 0.64                | 5.8×10 <sup>-3</sup>       |
|               | <b>CT</b>         |                      |                                   |                      |                                  |                                       |                     |                            |
|               | <i>LR(C(RW))C</i> |                      |                                   |                      |                                  |                                       |                     |                            |
| <b>After</b>  |                   | 8.2×10 <sup>-7</sup> | 0.73                              | 8.1×10 <sup>-4</sup> | 1.03                             | 0.055                                 | 0.23                | 4.6×10 <sup>-3</sup>       |
|               | <b>CT</b>         |                      |                                   |                      |                                  |                                       |                     |                            |

**Table S4** The preparation of specific electrolytes

| <b>Electrolytes</b>                                                                      | <b>Supporting electrolytes</b>               | <b>Additive</b>                                                                                              |
|------------------------------------------------------------------------------------------|----------------------------------------------|--------------------------------------------------------------------------------------------------------------|
| A                                                                                        | 9.9018 g KOH+1.1042 g LiOH•H <sub>2</sub> O  | -                                                                                                            |
| A+1 mM [Fe(CN) <sub>6</sub> ] <sup>3-</sup>                                              | 9.9018 g KOH+1.1042 g LiOH•H <sub>2</sub> O  | 0.0165 g K <sub>3</sub> [Fe(CN) <sub>6</sub> ]                                                               |
| A+5 mM [Fe(CN) <sub>6</sub> ] <sup>3-</sup>                                              | 9.9018 g KOH+1.1042 g LiOH•H <sub>2</sub> O  | 0.0827 g K <sub>3</sub> [Fe(CN) <sub>6</sub> ]                                                               |
| A+10 mM [Fe(CN) <sub>6</sub> ] <sup>3-</sup>                                             | 9.9018 g KOH+1.1042 g LiOH•H <sub>2</sub> O  | 0.1655 g K <sub>3</sub> [Fe(CN) <sub>6</sub> ]                                                               |
| A+20 mM [Fe(CN) <sub>6</sub> ] <sup>3-</sup>                                             | 9.9018 g KOH+1.1042 g LiOH•H <sub>2</sub> O  | 0.3309 g K <sub>3</sub> [Fe(CN) <sub>6</sub> ]                                                               |
| A+50 mM [Fe(CN) <sub>6</sub> ] <sup>3-</sup>                                             | 9.9018 g KOH+1.1042 g LiOH•H <sub>2</sub> O  | 0.8273 g K <sub>3</sub> [Fe(CN) <sub>6</sub> ]                                                               |
| A+100 mM [Fe(CN) <sub>6</sub> ] <sup>3-</sup>                                            | 9.9018 g KOH+1.1042 g LiOH•H <sub>2</sub> O  | 1.6545 g K <sub>3</sub> [Fe(CN) <sub>6</sub> ]                                                               |
| A+200 mM [Fe(CN) <sub>6</sub> ] <sup>3-</sup>                                            | 9.9018 g KOH+1.1042 g LiOH•H <sub>2</sub> O  | 3.3090 g K <sub>3</sub> [Fe(CN) <sub>6</sub> ]                                                               |
| A+1 mM [Cu(NH <sub>3</sub> ) <sub>4</sub> ] <sup>2+</sup>                                | 9.9018 g KOH+1.1042 g LiOH•H <sub>2</sub> O  | 0.0126 g CuSO <sub>4</sub> •5H <sub>2</sub> O +0.1 mL NH <sub>3</sub> •H <sub>2</sub> O                      |
| A+5 mM [Cu(NH <sub>3</sub> ) <sub>4</sub> ] <sup>2+</sup>                                | 9.9018 g KOH+1.1042 g LiOH•H <sub>2</sub> O  | 0.0631 g CuSO <sub>4</sub> •5H <sub>2</sub> O +0.5 mL NH <sub>3</sub> •H <sub>2</sub> O                      |
| A+10 mM [Cu(NH <sub>3</sub> ) <sub>4</sub> ] <sup>2+</sup>                               | 9.9018 g KOH+1.1042 g LiOH•H <sub>2</sub> O  | 0.1261 g CuSO <sub>4</sub> •5H <sub>2</sub> O +1 mL NH <sub>3</sub> •H <sub>2</sub> O                        |
| A+20 mM [Cu(NH <sub>3</sub> ) <sub>4</sub> ] <sup>2+</sup>                               | 9.9018 g KOH+1.1042 g LiOH•H <sub>2</sub> O  | 0.2522 g CuSO <sub>4</sub> •5H <sub>2</sub> O +2 mL NH <sub>3</sub> •H <sub>2</sub> O                        |
| C+10 mM [Fe(CN) <sub>6</sub> ] <sup>3-</sup>                                             | 15.3182 g KNO <sub>3</sub>                   | 0.1655 g K <sub>3</sub> [Fe(CN) <sub>6</sub> ]                                                               |
| B+10 mM [Cu(NH <sub>3</sub> ) <sub>4</sub> ] <sup>2+</sup>                               | 11.2387 g KCl                                | 0.1261 g CuSO <sub>4</sub> •5H <sub>2</sub> O +1 mL NH <sub>3</sub> •H <sub>2</sub> O                        |
| A+10 mM [Fe(CN) <sub>6</sub> ] <sup>3-</sup> +0.5 wt% Na <sub>2</sub> MoO <sub>4</sub>   | 9.9018 g KOH+1.1042 g LiOH•H <sub>2</sub> O  | 0.1655 g K <sub>3</sub> [Fe(CN) <sub>6</sub> ]+0.3058 g Na <sub>2</sub> MoO <sub>4</sub> •2H <sub>2</sub> O  |
| A+10 mM [Fe(CN) <sub>6</sub> ] <sup>3-</sup> +1.0 wt% Na <sub>2</sub> MoO <sub>4</sub>   | 9.9018 g KOH+1.1042 g LiOH•H <sub>2</sub> O  | 0.1655 g K <sub>3</sub> [Fe(CN) <sub>6</sub> ]+ 0.6116 g Na <sub>2</sub> MoO <sub>4</sub> •2H <sub>2</sub> O |
| A+10 mM [Fe(CN) <sub>6</sub> ] <sup>3-</sup> +1.5 wt% Na <sub>2</sub> MoO <sub>4</sub>   | 9.9018 g KOH+1.1042 g LiOH•H <sub>2</sub> O  | 0.1655 g K <sub>3</sub> [Fe(CN) <sub>6</sub> ]+ 0.9175 g Na <sub>2</sub> MoO <sub>4</sub> •2H <sub>2</sub> O |
| A'+10 mM [Fe(CN) <sub>6</sub> ] <sup>3-</sup> +1.0 wt% Na <sub>2</sub> MoO <sub>4</sub>  | 6.6012 g KOH+1.1042 g LiOH•H <sub>2</sub> O  | 0.1655 g K <sub>3</sub> [Fe(CN) <sub>6</sub> ]+ 0.5787 g Na <sub>2</sub> MoO <sub>4</sub> •2H <sub>2</sub> O |
| A''+10 mM [Fe(CN) <sub>6</sub> ] <sup>3-</sup> +1.0 wt% Na <sub>2</sub> MoO <sub>4</sub> | 13.2024 g KOH+1.1042 g LiOH•H <sub>2</sub> O | 0.1655 g K <sub>3</sub> [Fe(CN) <sub>6</sub> ]+ 0.6447 g Na <sub>2</sub> MoO <sub>4</sub> •2H <sub>2</sub> O |

Note: Volume = 50 mL.

**Table S5.** Specific capacity (C g<sup>-1</sup>) and cycling retention (%) of the 8<sup>#</sup> electrode in A electrolytes with different concentrations of [Fe(CN)<sub>6</sub>]<sup>3-</sup> additives.

| Conc. | Current density / (A g <sup>-1</sup> ) |      |     |       |                   |       |       | Cycling Retention%/<br>30 A g <sup>-1</sup> /10000 cycles |
|-------|----------------------------------------|------|-----|-------|-------------------|-------|-------|-----------------------------------------------------------|
|       | 1                                      | 2    | 4   | 8     | 16                | 32    | 64    |                                                           |
| 0     | 501                                    | 468  | 444 | 411.2 | 381.8             | 355.8 | 256   | 58                                                        |
| 1     | 572                                    | 528  | 488 | 440.8 | 396.6             | 342.4 | 222.7 | 70                                                        |
| 5     | 622                                    | 560  | 512 | 469.6 | 423.4             | 378.9 | 307.2 | 61                                                        |
| 10    | 724                                    | 618  | 560 | 522.4 | 468.3             | 422.7 | 333.4 | 43                                                        |
| 20    | 1017                                   | 760  | 664 | 610.4 | 540.8             | 479   | 365.4 | 37                                                        |
| 50    | 4179                                   | 1158 | 820 | 638.4 | 492.6             | 327.4 | 94.7  | 33                                                        |
| 100   | 5097                                   | 1254 | 828 | 739.2 | 572.8             | 448.6 | 260.5 | 4.2                                                       |
| 200   | 7926                                   | 5130 | 960 | 744   | $\frac{1067.}{2}$ | 642.6 | 299.5 | 1.6                                                       |



**Table S6** Specific capacity ( $C \text{ g}^{-1}$ ) and cycling retention (%) of the AC electrode in A electrolytes with different concentrations of  $[\text{Cu}(\text{NH}_3)_4]^{2+}$  additives.

| Conc. | Current density/ ( $\text{A g}^{-1}$ ) |       |       |       |       |       |       | Cycling Retention % /<br>$30 \text{ A g}^{-1}/10000 \text{ cycles}$ |
|-------|----------------------------------------|-------|-------|-------|-------|-------|-------|---------------------------------------------------------------------|
|       | 1                                      | 2     | 4     | 8     | 16    | 32    | 64    |                                                                     |
| 0     | 260                                    | 211.6 | 195.6 | 183.2 | 172.8 | 160   | 134.5 | 83                                                                  |
| 1     | 265.1                                  | 222.6 | 205.6 | 189.9 | 172.6 | 160.3 | 140.8 | 83                                                                  |
| 5     | 359                                    | 306   | 280   | 241.1 | 225.4 | 204.2 | 147.2 | 81                                                                  |
| 10    | 442                                    | 338   | 308   | 283   | 256   | 235.6 | 197.1 | 100                                                                 |
| 20    | 564                                    | 320   | 268   | 210.5 | 194.1 | 167.4 | 133.8 | 72                                                                  |

**Table S7** The active mass ratios of AC anode/811-8<sup>#</sup> cathode for SCs

| SCs  | $Q_m$ (C g <sup>-1</sup> ) / (1 A g <sup>-1</sup> ) |                                                              |                                                               |                    |                                                                                      |                                                 |                                                 | <i>m</i> -/ <i>m</i> <sup>+</sup> | <i>T</i><br>/ °C |
|------|-----------------------------------------------------|--------------------------------------------------------------|---------------------------------------------------------------|--------------------|--------------------------------------------------------------------------------------|-------------------------------------------------|-------------------------------------------------|-----------------------------------|------------------|
|      | AC                                                  |                                                              |                                                               | 811-8 <sup>#</sup> |                                                                                      |                                                 |                                                 |                                   |                  |
|      | A                                                   | A+10mM<br>[Cu(NH <sub>3</sub> ) <sub>4</sub> ] <sup>2+</sup> | B+10 mM<br>[Cu(NH <sub>3</sub> ) <sub>4</sub> ] <sup>2+</sup> | A                  | A+10 mM<br>[Fe(CN) <sub>6</sub> ] <sup>3-</sup> (+Na <sub>2</sub> MoO <sub>4</sub> ) | A+20 mM<br>[Fe(CN) <sub>6</sub> ] <sup>3-</sup> | C+10 mM<br>[Fe(CN) <sub>6</sub> ] <sup>3-</sup> |                                   |                  |
| I    |                                                     | 442                                                          |                                                               |                    | 724                                                                                  |                                                 |                                                 | <b>1.6/1</b>                      | 25               |
| II   |                                                     | 442                                                          |                                                               |                    |                                                                                      |                                                 | 1017                                            | <b>2.3/1</b>                      | 25               |
| III  |                                                     |                                                              | 434                                                           |                    | 724                                                                                  |                                                 |                                                 | <b>1.7/1</b>                      | 25               |
| IV   |                                                     | 442                                                          |                                                               |                    |                                                                                      |                                                 | 168                                             | <b>1/2.6</b>                      | 25               |
| V    |                                                     |                                                              | 434                                                           |                    |                                                                                      |                                                 | 168                                             | <b>1/2.6</b>                      | 25               |
| VI   | 260                                                 |                                                              |                                                               | 501                |                                                                                      |                                                 |                                                 | <b>1.9/1</b>                      | 25               |
| I    |                                                     | 442                                                          |                                                               |                    | 724                                                                                  |                                                 |                                                 | <b>1.6/1</b>                      | -20              |
| I    |                                                     | 442                                                          |                                                               |                    | 724                                                                                  |                                                 |                                                 | <b>1.6/1</b>                      | 50               |
| VII  |                                                     | 442                                                          |                                                               |                    | 724                                                                                  |                                                 |                                                 | <b>1.6/1</b>                      | 50               |
| VIII |                                                     | 442                                                          |                                                               |                    | 724                                                                                  |                                                 |                                                 | <b>1.6/1</b>                      | 50               |
| IX   |                                                     | 442                                                          |                                                               |                    | 724                                                                                  |                                                 |                                                 | <b>1.6/1</b>                      | 50               |
| X    |                                                     | 442                                                          |                                                               |                    | 724                                                                                  |                                                 |                                                 | <b>1.6/1</b>                      | 50               |
| XI   |                                                     | 442                                                          |                                                               |                    | 724                                                                                  |                                                 |                                                 | <b>1.6/1</b>                      | 50               |

**Table S8** The specific electrolytes of AC anode and 811-8<sup>#</sup> cathode for SCs

| SCs  | AC                                                         | 811-8 <sup>#</sup>                                                                       |
|------|------------------------------------------------------------|------------------------------------------------------------------------------------------|
| I    | A+10 mM [Cu(NH <sub>3</sub> ) <sub>4</sub> ] <sup>2+</sup> | A+10 mM [Fe(CN) <sub>6</sub> ] <sup>3-</sup>                                             |
| II   | A+10 mM [Cu(NH <sub>3</sub> ) <sub>4</sub> ] <sup>2+</sup> | A+20 mM [Fe(CN) <sub>6</sub> ] <sup>3-</sup>                                             |
| III  | B+10 mM [Cu(NH <sub>3</sub> ) <sub>4</sub> ] <sup>2+</sup> | A+10 mM [Fe(CN) <sub>6</sub> ] <sup>3-</sup>                                             |
| IV   | A+10 mM [Cu(NH <sub>3</sub> ) <sub>4</sub> ] <sup>2+</sup> | C+10 mM [Fe(CN) <sub>6</sub> ] <sup>3-</sup>                                             |
| V    | B+10 mM [Cu(NH <sub>3</sub> ) <sub>4</sub> ] <sup>2+</sup> | C+10 mM [Fe(CN) <sub>6</sub> ] <sup>3-</sup>                                             |
| VI   | A                                                          | A                                                                                        |
| VII  | A+10 mM [Cu(NH <sub>3</sub> ) <sub>4</sub> ] <sup>2+</sup> | A+10 mM [Fe(CN) <sub>6</sub> ] <sup>3-</sup> +0.5 wt% Na <sub>2</sub> MoO <sub>4</sub>   |
| VIII | A+10 mM [Cu(NH <sub>3</sub> ) <sub>4</sub> ] <sup>2+</sup> | A+10 mM [Fe(CN) <sub>6</sub> ] <sup>3-</sup> +1.0 wt% Na <sub>2</sub> MoO <sub>4</sub>   |
| IX   | A+10 mM [Cu(NH <sub>3</sub> ) <sub>4</sub> ] <sup>2+</sup> | A+10 mM [Fe(CN) <sub>6</sub> ] <sup>3-</sup> +1.5 wt% Na <sub>2</sub> MoO <sub>4</sub>   |
| X    | A+10 mM [Cu(NH <sub>3</sub> ) <sub>4</sub> ] <sup>2+</sup> | A'+10 mM [Fe(CN) <sub>6</sub> ] <sup>3-</sup> +1.0 wt% Na <sub>2</sub> MoO <sub>4</sub>  |
| XI   | A+10 mM [Cu(NH <sub>3</sub> ) <sub>4</sub> ] <sup>2+</sup> | A''+10 mM [Fe(CN) <sub>6</sub> ] <sup>3-</sup> +1.0 wt% Na <sub>2</sub> MoO <sub>4</sub> |

**Table S9** Ragone and cycling behavior of SCs at room temperature.

| SCs | Energy density/<br>Wh kg <sup>-1</sup> | Power density/<br>kW kg <sup>-1</sup> | Cycling Retention%                                                 |
|-----|----------------------------------------|---------------------------------------|--------------------------------------------------------------------|
| I   | 62.95-15.64                            | 0.28-9.07                             | 79%/10000/20 A g <sup>-1</sup><br>88%/10000/20 A g <sup>-1</sup> * |
| II  | 54.3-6.86                              | 0.24-7.53                             | 100%/10000/20 A g <sup>-1</sup>                                    |
| III | 54.14-1.42                             | 0.27-8.53                             | 100%/10000/20 A g <sup>-1</sup>                                    |
| IV  | 22.20-5.31                             | 0.71-11.37                            | 75%/10000/5 A g <sup>-1</sup>                                      |
| V   | 11.62-3.54                             | 0.73-11.64                            | 142%/10000/4 A g <sup>-1</sup>                                     |
| VI  | 20.55-9.23                             | 0.26-8.31                             | 14%/10000/20 A g <sup>-1</sup>                                     |

Note: \* the value is based on the 30<sup>th</sup> cycle.

**Table S10.** A comparison for the performance of the SCs in the study with some reported SCs.

| SCs                                                     | Electrolytes                                                                                                    | Working voltage / V | Energy density / Wh kg <sup>-1</sup> | Power density / kW kg <sup>-1</sup> | Cycling behavior / retention%, cycles, current density | Refs. |
|---------------------------------------------------------|-----------------------------------------------------------------------------------------------------------------|---------------------|--------------------------------------|-------------------------------------|--------------------------------------------------------|-------|
| <b>SCs without redox electrolytes</b>                   |                                                                                                                 |                     |                                      |                                     |                                                        |       |
| K-Ni-Co-F//AC                                           | 3 M KOH+0.5 M LiOH                                                                                              | 1.5                 | 42.7                                 | 0.242                               | 98%/10000/4 A g <sup>-1</sup>                          | 1     |
| K-Co-Mn-F//AC                                           | 3 M KOH+0.5 M LiOH                                                                                              | 1.5                 | 8                                    | 0.14                                | 90%/10000/5A g <sup>-1</sup>                           | 2     |
| Co(OH) <sub>2</sub> //GO                                | 1 M KOH                                                                                                         | 1.2                 | 11.94                                | 2.54                                | /                                                      | 3     |
| MnO <sub>2</sub> //AC                                   | 0.5 M K <sub>2</sub> SO <sub>4</sub>                                                                            | 1.8                 | 28.4                                 | 0.15                                | 94%/23000/10 C                                         | 4     |
| Ni(OH) <sub>2</sub> //AC                                | 1 M KOH                                                                                                         | 1.3                 | 35.7                                 | 0.49                                | 81%/10000/50 mV s <sup>-1</sup>                        | 5     |
| Co <sub>3</sub> O <sub>4</sub> //NPC                    | 6 M KOH                                                                                                         | 1.6                 | 36                                   | 1.6                                 | 89%/2000/5 A g <sup>-1</sup>                           | 6     |
| Ni-Zn-Co oxide/hydroxide//AC                            | 6 M KOH                                                                                                         | 1.5                 | 16.62                                | 2.9                                 | 84%/1000/2A g <sup>-1</sup>                            | 7     |
| NiCo <sub>2</sub> O <sub>4</sub> //RGO                  | 6 M KOH                                                                                                         | 1.3                 | 23.9                                 | 0.65                                | 93.5%/10000/5 A g <sup>-1</sup>                        | 8     |
| NiCo <sub>2</sub> O <sub>4</sub> @MnO <sub>2</sub> //AC | 1 M NaOH                                                                                                        | 1.5                 | 35                                   | 0.163                               | 71%/5000/18 mA cm <sup>-2</sup>                        | 9     |
| CQDs/NiCo <sub>2</sub> O <sub>4</sub> //AC              | 2 M KOH                                                                                                         | 1.5                 | 27.8                                 | 0.128                               | 101.9%/5000/3 A g <sup>-1</sup>                        | 10    |
| rGO/NiCo <sub>2</sub> O <sub>4</sub> //AC               | 2 M KOH                                                                                                         | 1.3                 | 23.32                                | 0.325                               | 83%/2500/2A g <sup>-1</sup>                            | 11    |
| <b>SCs with redox electrolytes</b>                      |                                                                                                                 |                     |                                      |                                     |                                                        |       |
| AC//AC                                                  | 2 M KOH+0.050 g PPD                                                                                             | 1                   | 19.86                                | 17                                  | 94.5%/4000/1 A g <sup>-1</sup>                         | 12    |
| AC//AC                                                  | 1 M Na <sub>2</sub> SO <sub>4</sub> +0.1 M Fe(CN) <sub>6</sub> <sup>3+</sup> /Fe(CN) <sub>6</sub> <sup>4+</sup> | 2                   | 19.8                                 | 11.5                                | 80%/7000/30 mA cm <sup>-2</sup>                        | 13    |
| AC//AC                                                  | 1 M KBr+0.1 M MVCl <sub>2</sub>                                                                                 | 1.4                 | 51                                   | 0.52                                | 30%/300/0.5 A g <sup>-1</sup>                          | 14    |
| rGO//rGO                                                | 1 M KOH+0.05 M KI                                                                                               | 0.8                 | 44                                   | /                                   | 81%/5000/0.83 A g <sup>-1</sup>                        | 15    |

|                                |                                                                                  |              |              |             |                                                                                     |                  |
|--------------------------------|----------------------------------------------------------------------------------|--------------|--------------|-------------|-------------------------------------------------------------------------------------|------------------|
| AC//AC                         | 1.2 M $K_3Fe(CN)_6$                                                              | 0.8          | 28.3         | <0.1        | 80%/9000/1 A g <sup>-1</sup>                                                        | 16               |
| PANI//PANI                     | 1 M $H_2SO_4$ +0.8 M $Fe^{3+}/Fe^{2+}$                                           | 0.8          | 22.1         | 0.774       | 93%/10000/5 A g <sup>-1</sup>                                                       | 17               |
| AC//AC                         | 1.2 M EVBr <sub>2</sub> +0.12 M TBABr+2.88 M NaBr                                | 1.35         | 64           | >3          | 90%/5000/2 A g <sup>-1</sup>                                                        | 18               |
| AC//AC                         | 1 M $H_2SO_4$ +0.03 M viologen                                                   | 0.9          | 23           |             | 130%/1000/2.5 A g <sup>-1</sup>                                                     | 19               |
| AC//AC                         | 1 M $H_2SO_4$ +0.08 M KBr                                                        | 0.8          | 11.6         |             | 100%/4000/5 mA cm <sup>-2</sup>                                                     | 20               |
| AC//AC                         | 1 M $H_2SO_4$ +0.3 g $VOSO_4$                                                    | 0.8          | 13.7         | 0.325       | 97.6%/4000/5 mA cm <sup>-2</sup>                                                    | 21               |
| FAC//FAC                       | 2 M KOH+0.04 M $K_3Fe(CN)_6$                                                     | 0.6          | 23.9         | 1           | 90%/2000/1 A g <sup>-1</sup>                                                        | 22               |
| AC//KNCMF-811(8 <sup>#</sup> ) | <b>3 M KOH + 0.5 M LiOH+10 mM</b>                                                | 1.5          | <b>62.95</b> | <b>0.28</b> | <b>79%/10000/20 A g<sup>-1</sup></b><br><b>(based on the 1<sup>st</sup> cycle)</b>  | <b>This work</b> |
|                                | <b>[Cu(NH<sub>3</sub>)<sub>4</sub>]<sup>2+</sup>//3 M KOH + 0.5 M LiOH+10 mM</b> |              | <b>54.94</b> | <b>0.57</b> |                                                                                     |                  |
|                                | <b>[Fe(CN)<sub>6</sub>]<sup>3-</sup></b>                                         |              | <b>45.94</b> | <b>1.13</b> | <b>88%/10000/20 A g<sup>-1</sup></b><br><b>(based on the 30<sup>th</sup> cycle)</b> |                  |
|                                |                                                                                  |              | <b>33.04</b> | <b>2.22</b> |                                                                                     |                  |
|                                |                                                                                  |              | <b>26.36</b> | <b>4.49</b> |                                                                                     |                  |
|                                |                                                                                  | <b>15.64</b> | <b>9.07</b>  |             |                                                                                     |                  |

---

**Table S11** Ragone and cycling behavior of SCs at low and high temperatures.

| <b>Temperature</b> | <b>SCs</b> | <b>Energy density/<br/>Wh kg<sup>-1</sup></b> | <b>Power density/<br/>kW kg<sup>-1</sup></b> | <b>Cycling Retention%/<br/>20 A g<sup>-1</sup>/5000 cycles</b> |
|--------------------|------------|-----------------------------------------------|----------------------------------------------|----------------------------------------------------------------|
| -20 °C             | I          | 36.81-3.18                                    | 0.14-1.73                                    | 72*                                                            |
|                    | I          | 70.08-17.38                                   | 0.29-9.37                                    | 29                                                             |
| 50 °C              | VII        | 52.17-11.35                                   | 0.28-9.12                                    | 58                                                             |
|                    | VIII       | 67.19-15.8                                    | 0.3-9.48                                     | 61                                                             |
|                    | IX         | 44.12-19.15                                   | 0.27-8.61                                    | 31                                                             |
|                    | X          | 38.75-12.21                                   | 0.26-8.45                                    | 28                                                             |
|                    | XI         | 53.94-17.04                                   | 0.27-8.65                                    | 41                                                             |

Note: \* 10000 cycles

**Table S12** Chemicals, reagents and materials used in the study.

| <b>Chemicals,<br/>Reagents and<br/>Materials</b> | <b>Type</b>      | <b>Company</b>                          | <b>Characteristics</b>                                                                          |
|--------------------------------------------------|------------------|-----------------------------------------|-------------------------------------------------------------------------------------------------|
| <b>NiCl<sub>2</sub>•6H<sub>2</sub>O</b>          | AR               | SinoPharm                               | purity≥98.0%                                                                                    |
| <b>CoCl<sub>2</sub>•6H<sub>2</sub>O</b>          | AR               | SinoPharm                               | purity≥99.0%                                                                                    |
| <b>MnCl<sub>2</sub>•4H<sub>2</sub>O</b>          | AR               | SinoPharm                               | purity≥99.0%                                                                                    |
| <b>KF•2H<sub>2</sub>O</b>                        | AR               | SinoPharm                               | purity≥99.0%                                                                                    |
| <b>PVP-K30</b>                                   | GR               | SinoPharm                               | /                                                                                               |
| <b>CuSO<sub>4</sub>•5H<sub>2</sub>O</b>          | AR               | Tianjin Fengchuan<br>Chemical Reagent   | purity≥99.0%                                                                                    |
| <b>K<sub>3</sub>[Fe(CN)<sub>6</sub>]</b>         | AR               | Changsha Fenlukou<br>Reagent            | purity≥99.5%                                                                                    |
| <b>NH<sub>3</sub>•H<sub>2</sub>O</b>             | AR               | Xilong Scientific                       | w: 25%-28%                                                                                      |
| <b>KOH</b>                                       | AR               | SinoPharm                               | purity≥85.0%                                                                                    |
| <b>LiOH•H<sub>2</sub>O</b>                       | AR               | SinoPharm                               | purity≥95.0%                                                                                    |
| <b>KCl</b>                                       | AR               | SinoPharm                               | purity≥99.5%                                                                                    |
| <b>KNO<sub>3</sub></b>                           | AR               | Xilong Scientific                       | purity≥99.0%                                                                                    |
| <b>EG</b>                                        | AR               | SinoPharm                               | purity≥99.0%                                                                                    |
| <b>NBA</b>                                       | AR               | SinoPharm                               | purity≥99.5%                                                                                    |
| <b>NPA</b>                                       | AR               | SinoPharm                               | purity≥99.0%                                                                                    |
| <b>AC</b>                                        | YEC 8a           | FuZhou YiHuan                           | D50: ~10 μm; Density: >0.4 g<br>cm <sup>-3</sup> ; SSA:2000~2500 m <sup>2</sup> g <sup>-1</sup> |
| <b>AB</b>                                        | Battery<br>grade | /                                       | /                                                                                               |
| <b>NMP</b>                                       | AR               | Kermel                                  | purity≥99.0%                                                                                    |
| <b>PVDF</b>                                      | Battery<br>grade | /                                       | /                                                                                               |
| <b>Nickel foam</b>                               | Battery<br>grade | Tianjin Aiweixin<br>Chemical Technology | Thickness: 1.5 mm                                                                               |
| <b>Proton exchange<br/>membrane</b>              | N115             | Dupont                                  | Thickness: 127 μm                                                                               |



## References

- [1] R. Ding, X. D. Li, W. Shi, Q. L. Xu, X. L. Han, Y. Zhou, W. F. Hong and E. H. Liu, Perovskite  $\text{KNi}_{0.8}\text{Co}_{0.2}\text{F}_3$  nanocrystals for supercapacitors, *J. Mater. Chem. A*, 2017, **5**, 17822-17827.
- [2] W. Shi, R. Ding, X. D. Li, Q. L. Xu, D. F. Ying, Y. F. Huang and E. H. Liu, Bimetallic Co-Mn Perovskite Fluorides as Highly-Stable Electrode Materials for Supercapacitors, *Chem. Eur. J.*, 2017, **23**, 15305-15311.
- [3] R. R. Salunkhe, B. P. Bastakoti, C.-T. Hsu, N. Suzuki, J. H. Kim, S. X. Dou, C.-C. Hu and Y. Yamauchi, Direct growth of cobalt hydroxide rods on nickel foam and its application for energy storage, *Chem. Eur. J.*, 2014, **20**, 3084-3088.
- [4] Q. T. Qu, P. Zhang, B. Wang, Y. H. Chen, S. Tian, Y. P. Wu and R. Holze, Electrochemical performance of  $\text{MnO}_2$  nanorods in neutral aqueous electrolytes as a cathode for asymmetric supercapacitors, *J. Phys. Chem. C*, 2009, **113**, 14020-14027.
- [5] H. B. Li, M. H. Yu, F. X. Wang, P. Liu, Y. Liang, J. Xiao, C. X. Wang, Y. X. Tong and G. W. Yang, Amorphous nickel hydroxide nanospheres with ultrahigh capacitance and energy density as electrochemical pseudocapacitor materials, *Nat. Commun.*, 2013, **4**, 1894.
- [6] R. R. Salunkhe, J. Tang, Y. Kamachi, T. Nakato, J. H. Kim and Y. Yamauchi, Asymmetric supercapacitors using 3D nanoporous carbon and cobalt oxide electrodes synthesized from a single metal-organic framework, *ACS nano*, 2015, **9**, 6288-6296.
- [7] H. L. Wang, Q. M. Gao and J. Hu. Asymmetric capacitor based on superior porous Ni-Zn-Co oxide/hydroxide and carbon electrodes, *J. Power Sources*, 2010, **195**, 3017-3024.
- [8] H. C. Chen, J. J. Jiang, L. Zhang, T. Qi, D. D. Xia and H. Z. Wan, Facilely synthesized porous  $\text{NiCo}_2\text{O}_4$  flowerlike nanostructure for high-rate supercapacitors, *J. Power Sources*, 2014, **248**, 28-36.

- [9] K. B. Xu, W. Y. Li, Q. Liu, B. Li, X. J. Liu, L. An, Z. G. Chen, R. J. Zou and J. Q. Hu, Hierarchical mesoporous NiCo<sub>2</sub>O<sub>4</sub>@MnO<sub>2</sub> core-shell nanowire arrays on nickel foam for aqueous asymmetric supercapacitors, *J. Mater. Chem. A*, 2014, **2**, 4795-4802.
- [10] Y. R. Zhu, Z. B. Wu, M. J. Jing, H. S. Hou, Y. C. Yang, Y. Zhang, X. M. Yang, W. X. Song, X. N. Jia and X. B. Ji, Porous NiCo<sub>2</sub>O<sub>4</sub> spheres tuned through carbon quantum dots utilised as advanced materials for an asymmetric supercapacitor, *J. Mater. Chem. A*, 2015, **3**, 866-877.
- [11] X. Wang, W. S. Liu, X. H. Lu and P. S. Lee, Dodecyl sulfate-induced fast faradic process in nickel cobalt oxide-reduced graphite oxide composite material and its application for asymmetric supercapacitor device, *J. Mater. Chem.*, 2012, **22**, 23114-23119.
- [12] J. H. Wu, H. J. Yu, L. Q. Fan, G. G. Luo, J. M. Lin and M. L. Huang, A simple and high-effective electrolyte mediated with *p*-phenylenediamine for supercapacitor, *J. Mater. Chem.*, 2012, **22**, 19025-19030.
- [13] J. Y. Hwang, M. P. Li, M. F. El-Kady and R. B. Kaner, Next-Generation Activated Carbon Supercapacitors: A Simple Step in Electrode Processing Leads to Remarkable Gains in Energy Density, *Adv. Funct. Mater.*, 2017, **27**, 1605745.
- [14] S.-E. Chun, B. Evanko, X. F. Wang, D. Vonlanthen, X. L. Ji, G. D. Stucky and S. W. Boettcher, Design of aqueous redox-enhanced electrochemical capacitors with high specific energies and slow self-discharge, *Nat. Commun.*, 2015, **6**, 7818.
- [15] K. V. Sankar, R. K. Selvan. Improved electrochemical performances of reduced graphene oxide based supercapacitor using redox additive electrolyte, *Carbon*, 2015, **90**, 260-273.
- [16] J. Lee, S. Choudhury, D. Weingarth, D. Kim and V. Presser, High performance hybrid energy storage with potassium ferricyanide redox electrolyte, *ACS Appl. Mater. Interfaces*, 2016, **8**, 23676-23687.
- [17] L. J. Ren, G. N. Zhang, Z. Yan, L. P. Kang, H. Xu, F. Shi, Z. B. Lei and Z. H. Liu, High capacitive property for supercapacitor using Fe<sup>3+</sup>/Fe<sup>2+</sup> redox couple additive electrolyte, *Electrochim. Acta*, 2017, **231**, 705-712.

- [18] S. J. Yoo, B. Evanko, X. F. Wang, M. Romelczyk, A. Taylor, X. L. Ji, S. W. Boettcher and G. D. Stucky, Fundamentally addressing bromine storage through reversible solid-state confinement in porous carbon electrodes: design of a high-performance dual-redox electrochemical capacitor, *J. Am. Chem. Soc.*, 2017, **139**, 9985-9993.
- [19] S. Sathyamoorthi, M. Kanagaraj, M. Kathiresan, V. Suryanarayanan and D. Velayutham, Ethyl viologen dibromide as a novel dual redox shuttle for supercapacitors, *J. Mater. Chem. A*, 2016, **4(12)**, 4562-4569.
- [20] S. T. Senthilkumar, R. K. Selvan, Y. S. Lee and J. S. Melo, Electric double layer capacitor and its improved specific capacitance using redox additive electrolyte, *J. Mater. Chem. A*, 2013, **1**, 1086-1095.
- [21] S. T. Senthilkumar, R. K. Selvan, N. Ponpandian, J. S. Melo and Y. S. Lee, Improved performance of electric double layer capacitor using redox additive ( $\text{VO}^{2+}/\text{VO}_2^+$ ) aqueous electrolyte, *J. Mater. Chem. A*, 2013, **1**, 7913-7919.
- [22] G. X. Wang, M. Y. Zhang, H. F. Xu, L. Lu, Z. Y. Xiao and S. Liu, Synergistic interaction between redox-active electrolytes and functionalized carbon in increasing the performance of electric double-layer capacitors, *J. Energy Chem.*, 2018, **27**, 1219-1224.
